# Supplementary material for: A silver(i)-catalyzed tandem reaction of 2-alkynylbenzaldoximes with ketenes
Source: Royal Society of Chemistry journal article supplement (doi:10.1039/c3ob27427f), 2013-01-01

# A silver(I)-catalyzed tandem reaction of 2-alkynylbenzaldoxime with ketene

Hongliang Liu,<sup>a</sup> Gang Liu,<sup>a</sup> Shouzhi Pu\*<sup>a</sup> and Zhiyong Wang\*<sup>b</sup>

<sup>a</sup> Jiangxi Key Laboratory of Organic Chemistry, Jiangxi Science & Technology

Normal University, Nanchang 330013, China

<sup>b</sup> School of Chemistry and Chemical Engineering, Chongqing University, Chongqing

400044, China.

zwang@cqu.edu.cn

## Supporting Information

1. General experimental methods (S2)
2. General experimental procedure and characterization data (S3-S7)
3. <sup>1</sup>H and <sup>13</sup>C NMR spectra of compound **3** (S8-S35)
4. Checkcif file of compound **3f** (S36-S38)

### General experimental methods:

Unless otherwise stated, all commercial reagents and solvents were used without additional purification. All solvents and Et<sub>3</sub>N were dried and distilled according to standard procedures. All reactions were performed in reaction tubes under N<sub>2</sub>. The Flash column chromatography was performed using silica gel (60-Å pore size, 32–63 µm, standard grade). Analytical thin-layer chromatography was performed using glass plates pre-coated with 0.25 mm 230-400 mesh silica gel impregnated with a fluorescent indicator (254 nm). Thin layer chromatography plates were visualized by exposure to ultraviolet light. Organic solutions were concentrated on rotary evaporators at ~20 Torr (house vacuum) at 25-35°C. Nuclear magnetic resonance (NMR) spectra are recorded in parts per million from internal tetramethylsilane (TMS) on the δ scale.

### *General experimental procedure for silver triflate-catalyzed tandem reaction of 2-alkynylbenzaldehyde with ketene.*

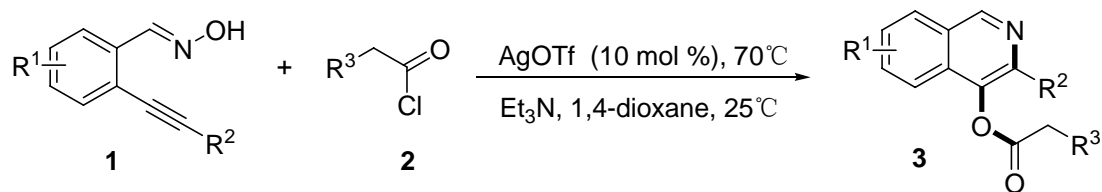

A mixture of Silver triflate (0.03 mmol, 7.7 mg) and 2-alkynylbenzaldehyde **1** (0.3 mmol) in 1,4-dioxane (1.0 mL) was stirred at 70 °C under N<sub>2</sub> for 2 hours. Then, Et<sub>3</sub>N (0.45 mmol, 46 mg) and ketene precursor **2** (0.45 mmol) in 1,4-dioxane (0.5 mL) were added. The reaction mixture was stirred at room temperature until completion of the reaction. The reaction mixture was diluted with ethyl acetate (5.0 mL), and quenched with water (5.0 mL). The organic layer was washed with brine, dried over Na<sub>2</sub>SO<sub>4</sub> and concentrated under reduced pressure. The residue was purified by column chromatography on silica gel to provide the desired product **3**.

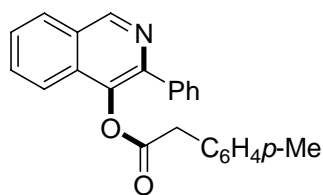

### 3-Phenylisoquinolin-4-yl 2-(*p*-tolyl)acetate (3a)

$^1\text{H}$  NMR (400 MHz,  $\text{CDCl}_3$ ):  $\delta$  9.23 (s, 1H), 8.00 (d,  $J = 8.0$  Hz, 1H), 7.76-7.73 (m, 2H), 7.67-7.57 (m, 4H), 7.40-7.38 (m, 2H), 7.17-7.16 (m, 4H), 3.82 (s, 2H), 2.37 (s, 3H);  $^{13}\text{C}$  NMR (100 MHz,  $\text{CDCl}_3$ ):  $\delta$  169.5, 150.3, 144.6, 139.6, 137.3, 131.1, 130.9, 129.9, 129.6, 129.5, 129.1, 128.5, 128.4, 127.6, 127.6, 120.8, 41.1, 21.3; HRMS calcd. for  $\text{C}_{24}\text{H}_{20}\text{NO}_2^+ [\text{M}+\text{H}]^+$ : 354.1489, found 354.1473.

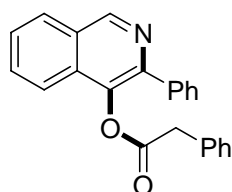

### 3-Phenylisoquinolin-4-yl 2-phenylacetate (3b)

$^1\text{H}$  NMR (400 MHz,  $\text{CDCl}_3$ ):  $\delta$  9.23 (s, 1H), 7.99 (d,  $J = 7.6$  Hz, 1H), 7.75-7.58 (m, 5H), 7.39-7.28 (m, 8H), 3.85 (s, 2H);  $^{13}\text{C}$  NMR (100 MHz,  $\text{CDCl}_3$ ):  $\delta$  169.1, 150.2, 144.4, 139.4, 137.2, 132.8, 131.0, 130.7, 129.5, 128.9, 128.8, 128.3, 127.5, 120.5; HRMS calcd. for  $\text{C}_{23}\text{H}_{18}\text{NO}_2^+ [\text{M}+\text{H}]^+$ : 340.1332, found 340.1315.

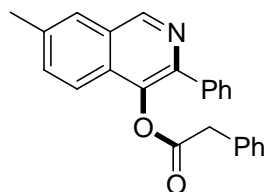

### 7-Methyl-3-phenylisoquinolin-4-yl 2-phenylacetate (3c)

$^1\text{H}$  NMR (400 MHz,  $\text{CDCl}_3$ ):  $\delta$  9.14 (s, 1H), 7.76-7.72 (m, 3H), 7.47-7.29 (m, 10H), 3.85 (s, 2H), 2.52 (s, 3H);  $^{13}\text{C}$  NMR (100 MHz,  $\text{CDCl}_3$ ):  $\delta$  169.1, 149.5, 143.6, 137.6, 137.2, 133.3, 132.9, 129.5, 129.3, 129.0, 128.9, 128.8, 128.3, 128.2, 127.5, 126.3, 41.5, 21.6; HRMS calcd. for  $\text{C}_{24}\text{H}_{20}\text{NO}_2^+ [\text{M}+\text{H}]^+$ : 354.1489, found 354.1454.

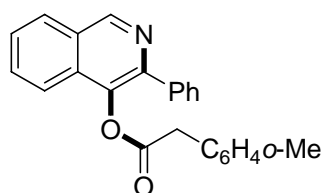

### 3-Phenylisoquinolin-4-yl 2-(*o*-tolyl)acetate (3d)

$^1\text{H}$  NMR (400 MHz,  $\text{CDCl}_3$ ):  $\delta$  9.22 (s, 1H), 7.99 (d,  $J = 8.0$  Hz, 1H), 7.72-7.57 (m, 5H), 7.43-7.38 (m, 3H), 7.22-7.18 (m, 4H), 3.87 (s, 2H), 2.21 (s, 3H);  $^{13}\text{C}$  NMR (100 MHz,  $\text{CDCl}_3$ ):  $\delta$  169.0, 150.3, 144.7, 139.6, 137.4, 137.2, 131.6, 131.2, 131.0, 130.7, 130.7, 129.1, 128.5, 127.9, 127.7, 127.6, 126.4, 120.6, 39.3, 19.6; HRMS calcd. for  $\text{C}_{24}\text{H}_{20}\text{NO}_2^+ [\text{M}+\text{H}]^+$ : 354.1489, found 354.1476.

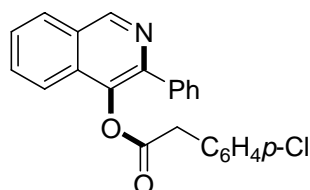

### 3-Phenylisoquinolin-4-yl 2-(4-chlorophenyl)acetate (3e)

$^1\text{H}$  NMR (400 MHz,  $\text{CDCl}_3$ ):  $\delta$  9.23 (s, 1H), 8.01 (d,  $J = 8.0$  Hz, 1H), 7.71-7.59 (m, 5H), 7.38-7.37 (m, 3H), 7.30 (d,  $J = 8.0$  Hz, 2H), 7.17 (d,  $J = 7.6$  Hz, 2H), 3.81 (s, 2H);  $^{13}\text{C}$  NMR (100 MHz,  $\text{CDCl}_3$ ):  $\delta$  168.7, 150.2, 144.5, 139.3, 137.0, 133.5, 131.2, 131.1, 130.7, 130.6, 128.9, 128.3, 127.6, 120.4, 40.6; HRMS calcd. for  $\text{C}_{23}\text{H}_{17}\text{ClNO}_2 [\text{M}+\text{H}]^+$ : 374.0942, found 374.0946.

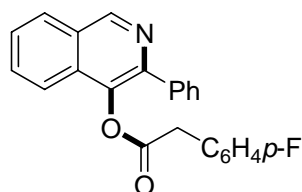

### 3-Phenylisoquinolin-4-yl 2-(4-fluorophenyl)acetate (3f)

$^1\text{H}$  NMR (400 MHz,  $\text{CDCl}_3$ ):  $\delta$  9.24 (s, 1H), 8.02 (d,  $J = 8.0$  Hz, 1H), 7.71-7.61 (m, 5H), 7.39-7.38 (m, 3H), 7.25-7.20 (m, 2H), 7.02 (t,  $J = 8.0$  Hz, 2H), 3.83 (s, 2H);  $^{13}\text{C}$  NMR (100 MHz,  $\text{CDCl}_3$ ):  $\delta$  169.1, 162.4 (d,  $^1J_{\text{CF}} = 245.8$  Hz), 150.4, 144.6, 139.5, 137.2, 131.2, 131.2, 131.1, 130.8, 129.1, 128.4, 127.7, 127.7, 120.6, 115.8 (d,  $^2J_{\text{CF}} = 21.5$  Hz), 40.6; HRMS calcd. for  $\text{C}_{23}\text{H}_{17}\text{FNO}_2 [\text{M}+\text{H}]^+$ : 358.1238, found 358.1221.

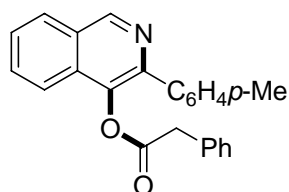

### 3-(*p*-Tolyl)isoquinolin-4-yl 2-phenylacetate (3g)

$^1\text{H}$  NMR (400 MHz,  $\text{CDCl}_3$ ):  $\delta$  9.21 (s, 1H), 7.97 (d,  $J = 8.0$  Hz, 1H), 7.65-7.55 (m,

5H), 7.35-7.29 (m, 5H), 7.19 (d,  $J = 7.6$  Hz, 2H), 3.86 (s, 2H), 2.39 (s, 3H);  $^{13}\text{C}$  NMR (100 MHz,  $\text{CDCl}_3$ ):  $\delta$  169.1, 150.1, 144.5, 139.2, 138.1, 134.3, 132.9, 130.9, 130.8, 129.5, 129.0, 128.8, 128.7, 127.4, 127.3, 120.5, 41.4, 21.3; HRMS calcd. for  $\text{C}_{24}\text{H}_{20}\text{NO}_2^+ [\text{M}+\text{H}]^+$ : 354.1489, found 354.1488.

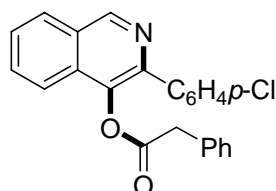

### 3-(4-Chlorophenyl)isoquinolin-4-yl 2-phenylacetate (3h)

$^1\text{H}$  NMR (400 MHz,  $\text{CDCl}_3$ ):  $\delta$  9.21 (s, 1H), 8.01 (d,  $J = 8.0$  Hz, 1H), 7.69-7.62 (m, 5H), 7.37-7.28 (m, 7H), 3.87 (s, 2H);  $^{13}\text{C}$  NMR (100 MHz,  $\text{CDCl}_3$ ):  $\delta$  168.9, 150.3, 143.3, 139.5, 135.5, 134.3, 132.5, 131.2, 130.7, 130.2, 129.4, 129.1, 128.8, 128.5, 127.7, 127.64, 127.5, 120.6, 41.5; HRMS calcd. for  $\text{C}_{23}\text{H}_{17}\text{ClNO}_2 [\text{M}+\text{H}]^+$ : 374.0942, found 374.0953.

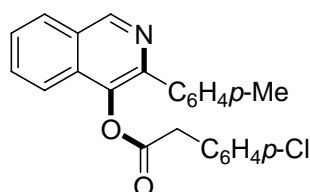

### 3-(p-Tolyl)isoquinolin-4-yl 2-(4-chlorophenyl)acetate (3i)

$^1\text{H}$  NMR (400 MHz,  $\text{CDCl}_3$ ):  $\delta$  9.21 (s, 1H), 7.99 (d,  $J = 8.0$  Hz, 1H), 7.69-7.57 (m, 5H), 7.30 (d,  $J = 7.2$  Hz, 2H), 7.19-7.15 (m, 4H), 3.82 (s, 2H), 2.40 (s, 3H);  $^{13}\text{C}$  NMR (100 MHz,  $\text{CDCl}_3$ ):  $\delta$  168.8, 150.3, 144.7, 139.3, 138.3, 134.3, 133.6, 131.4, 131.2, 130.9, 130.8, 129.1, 129.0, 128.9, 127.7, 127.5, 120.5, 40.8, 21.4; HRMS calcd. for  $\text{C}_{24}\text{H}_{19}\text{ClNO}_2^+ [\text{M}+\text{H}]^+$ : 388.1099, found 388.1079.

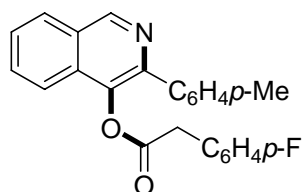

### 3-(p-Tolyl)isoquinolin-4-yl 2-(4-fluorophenyl)acetate (3j)

$^1\text{H}$  NMR (400 MHz,  $\text{CDCl}_3$ ):  $\delta$  9.22 (s, 1H), 7.99 (d,  $J = 8.0$  Hz, 1H), 7.67-.55 (m, 5H), 7.24-7.17 (m, 4H), 7.02 (t,  $J = 8.0$  Hz, 2H), 3.83 (s, 2H), 2.39 (s, 3H);  $^{13}\text{C}$  NMR (100 MHz,  $\text{CDCl}_3$ ):  $\delta$  168.9, 162.2 (d,  $^1J_{\text{CF}} = 245.8$  Hz), 150.1, 144.5, 139.2, 138.2,

134.2, 131.0, 131.0, 130.7, 129.0, 128.8, 128.7, 128.5, 127.5, 127.3, 120.3, 115.6 (d,  $^2J_{CF} = 21.7$  Hz), 40.5, 21.3; HRMS calcd. for  $C_{24}H_{19}FNO_3^+ [M+H]^+$ : 372.1394, found 372.1414.

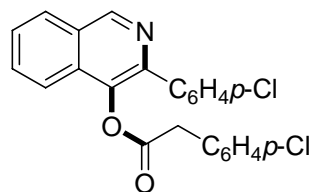

**3-(4-Chlorophenyl)isoquinolin-4-yl 2-(4-chlorophenyl)acetate (3k)**

$^1H$  NMR (400 MHz,  $CDCl_3$ ):  $\delta$  9.21 (s, 1H), 8.02 (d,  $J = 8.0$  Hz, 1H), 7.73-7.60 (m, 5H), 7.34-7.30 (m, 4H), 7.20 (d,  $J = 8.0$  Hz, 2H), 3.83 (s, 2H);  $^{13}C$  NMR (100 MHz,  $CDCl_3$ ):  $\delta$  168.5, 150.3, 143.3, 139.4, 135.4, 134.5, 133.7, 131.3, 131.0, 130.7, 130.6, 130.2, 129.1, 129.0, 128.5, 127.8, 127.6, 120.4, 40.7; HRMS calcd. for  $C_{23}H_{16}Cl_2NO_2^+ [M+H]^+$ : 408.0553, found 407.048.

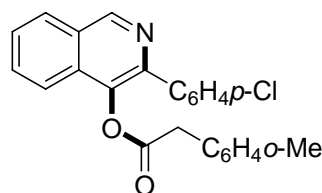

**3-(4-Chlorophenyl)isoquinolin-4-yl 2-(o-tolyl)acetate (3l)**

$^1H$  NMR (400 MHz,  $CDCl_3$ ):  $\delta$  9.20 (s, 1H), 7.99 (d,  $J = 8.0$  Hz, 1H), 7.70-7.58 (m, 5H), 7.30-7.20 (m, 6H), 3.87 (s, 2H), 2.23 (s, 3H);  $^{13}C$  NMR (100 MHz,  $CDCl_3$ ):  $\delta$  168.6, 150.2, 143.3, 139.5, 137.0, 135.5, 134.3, 131.2, 130.7, 130.6, 130.5, 130.2, 129.0, 128.5, 127.9, 127.7, 127.6, 126.3, 120.5, 39.2, 19.4; HRMS calcd. for  $C_{24}H_{19}ClNO_2^+ [M+H]^+$ : 388.1099, found 388.1116.

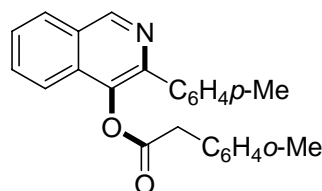

**3-(p-tolyl)isoquinolin-4-yl 2-(o-tolyl)acetate (3m)**

$^1H$  NMR (400 MHz,  $CDCl_3$ ):  $\delta$  9.21 (s, 1H), 7.97 (d,  $J = 8.0$  Hz, 1H), 7.66-7.54 (m, 5H), 7.25-7.18 (m, 6H), 3.87 (s, 2H), 2.40 (s, 3H), 2.23 (s, 3H);  $^{13}C$  NMR (100 MHz,  $CDCl_3$ ):  $\delta$  168.9, 150.0, 144.6, 139.3, 138.1, 137.0, 134.3, 131.5, 130.9, 130.8, 130.5, 129.0, 128.8, 127.7, 127.5, 127.3, 126.2, 120.4, 39.2, 21.3, 19.5;  $C_{25}H_{22}NO_2S^+$

$[M+H]^+$ : 368.1645, found 368.1661.

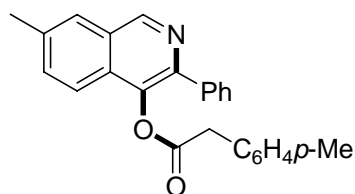

**7-Methyl-3-phenylisoquinolin-4-yl 2-(*p*-tolyl)acetate (3n)**

$^1\text{H}$  NMR (400 MHz,  $\text{CDCl}_3$ ):  $\delta$  9.14 (s, 1H), 7.75-7.72 (m, 3H), 7.48-7.37 (m, 5H), 7.18-7.14 (m, 4H), 3.80 (s, 2H), 2.52 (s, 3H), 2.37 (s, 3H);  $^{13}\text{C}$  NMR (100 MHz,  $\text{CDCl}_3$ ):  $\delta$  169.3, 149.5, 143.6, 139.6, 137.6, 137.3, 137.1, 133.3, 129.8, 129.4, 129.3, 129.0, 128.9, 128.3, 128.1, 126.2, 120.5, 41.0, 21.6, 21.1; HRMS calcd. for  $\text{C}_{25}\text{H}_{22}\text{NO}_2^+$   $[M+H]^+$ : 368.1645, found 368.1665.

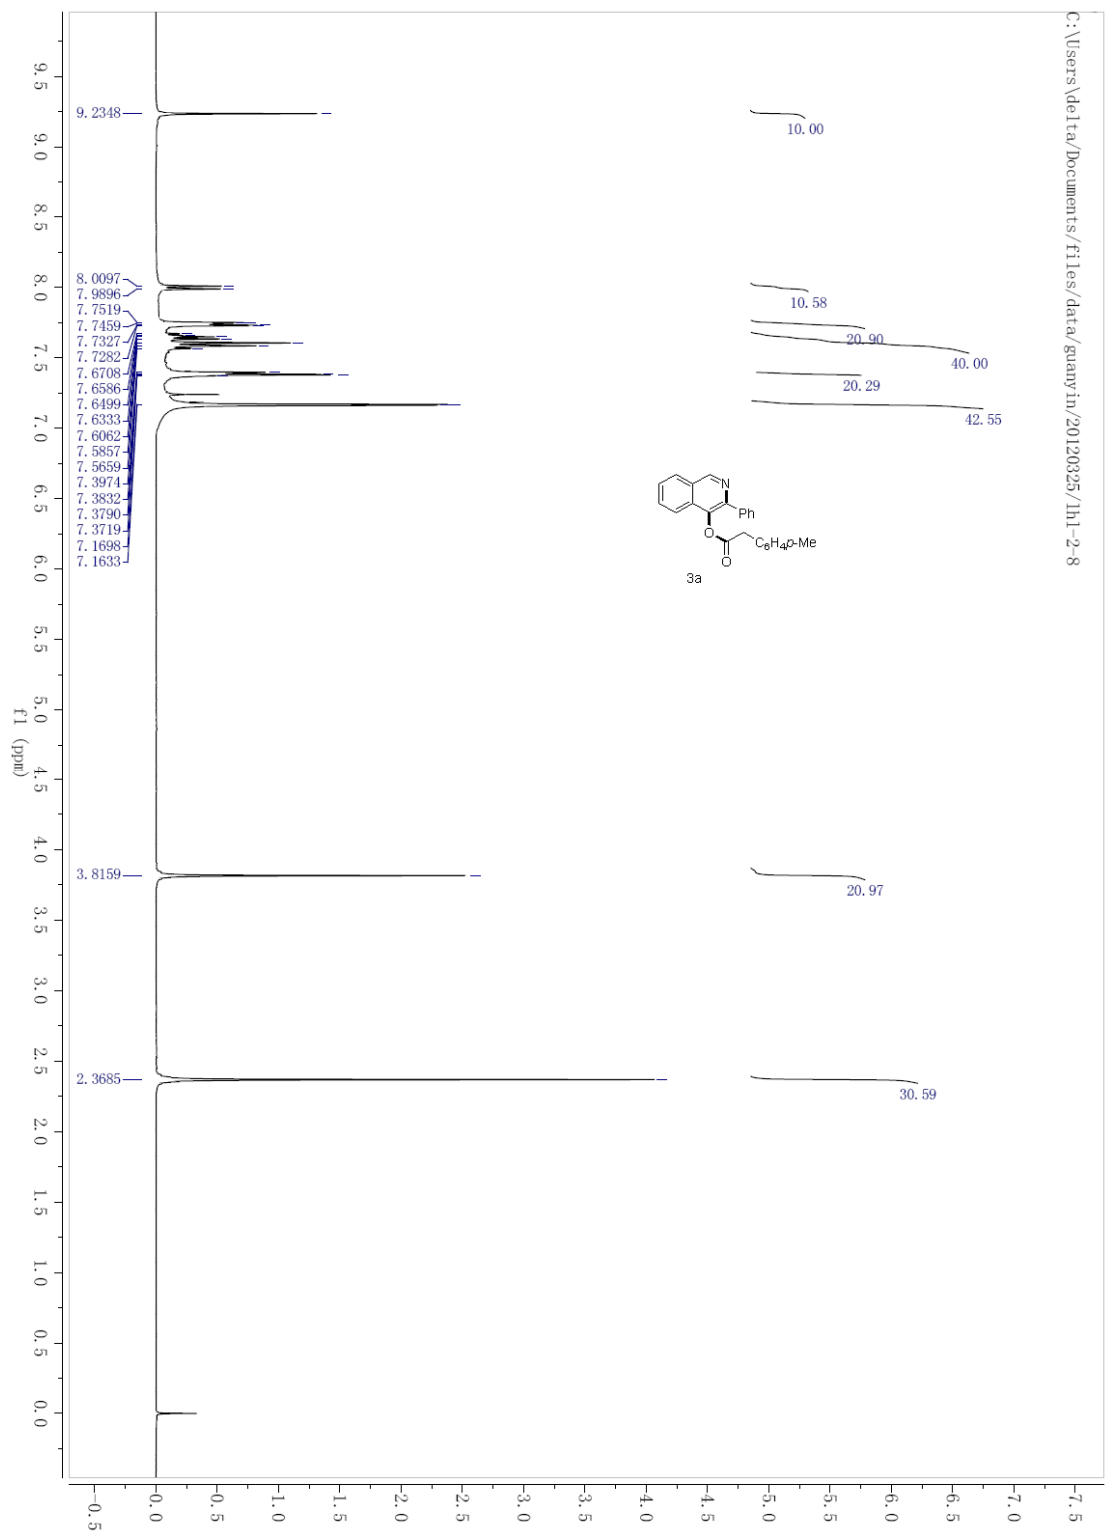

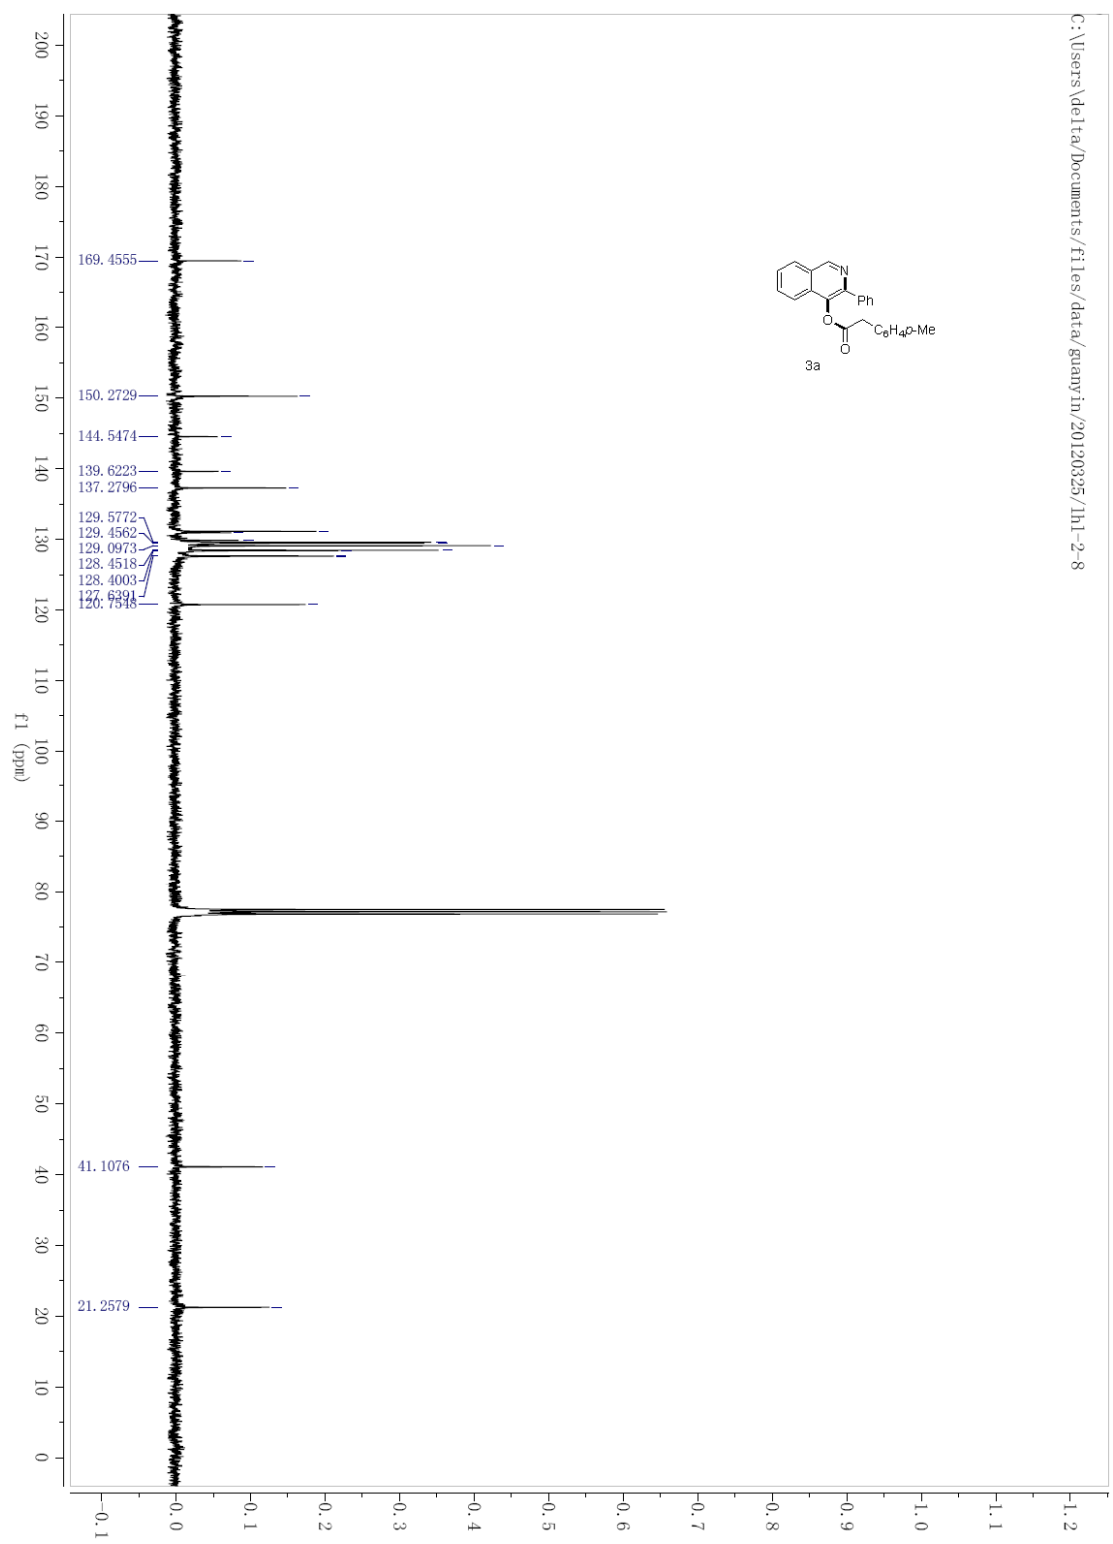

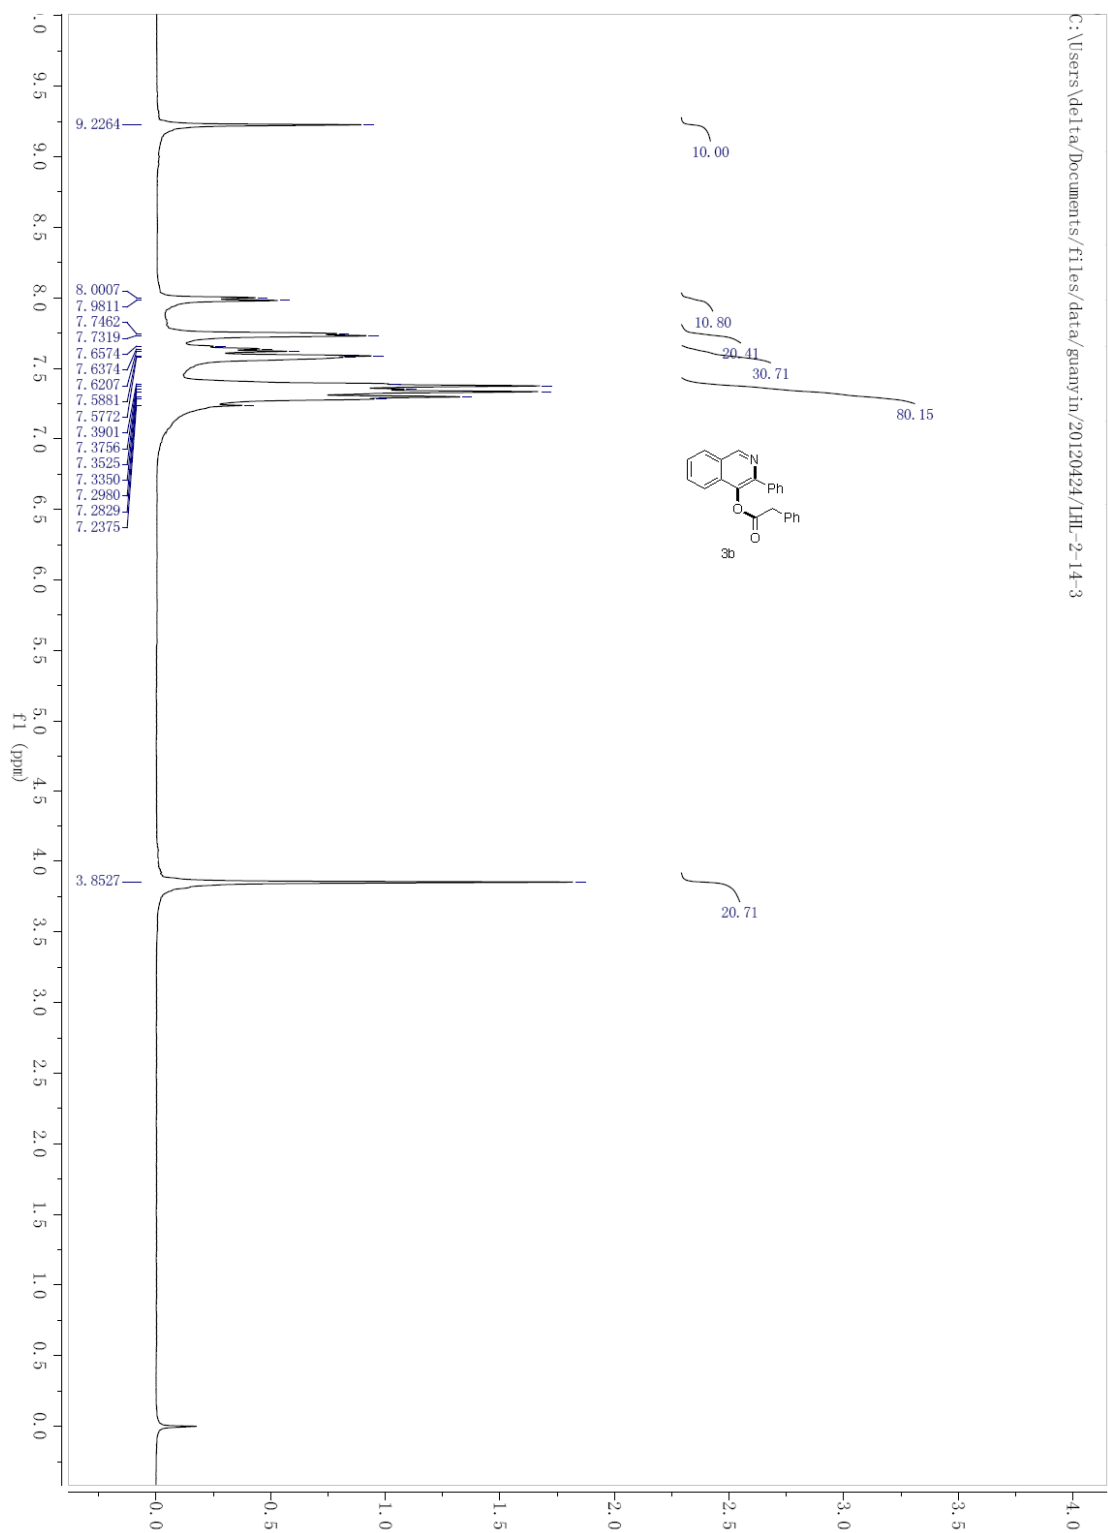

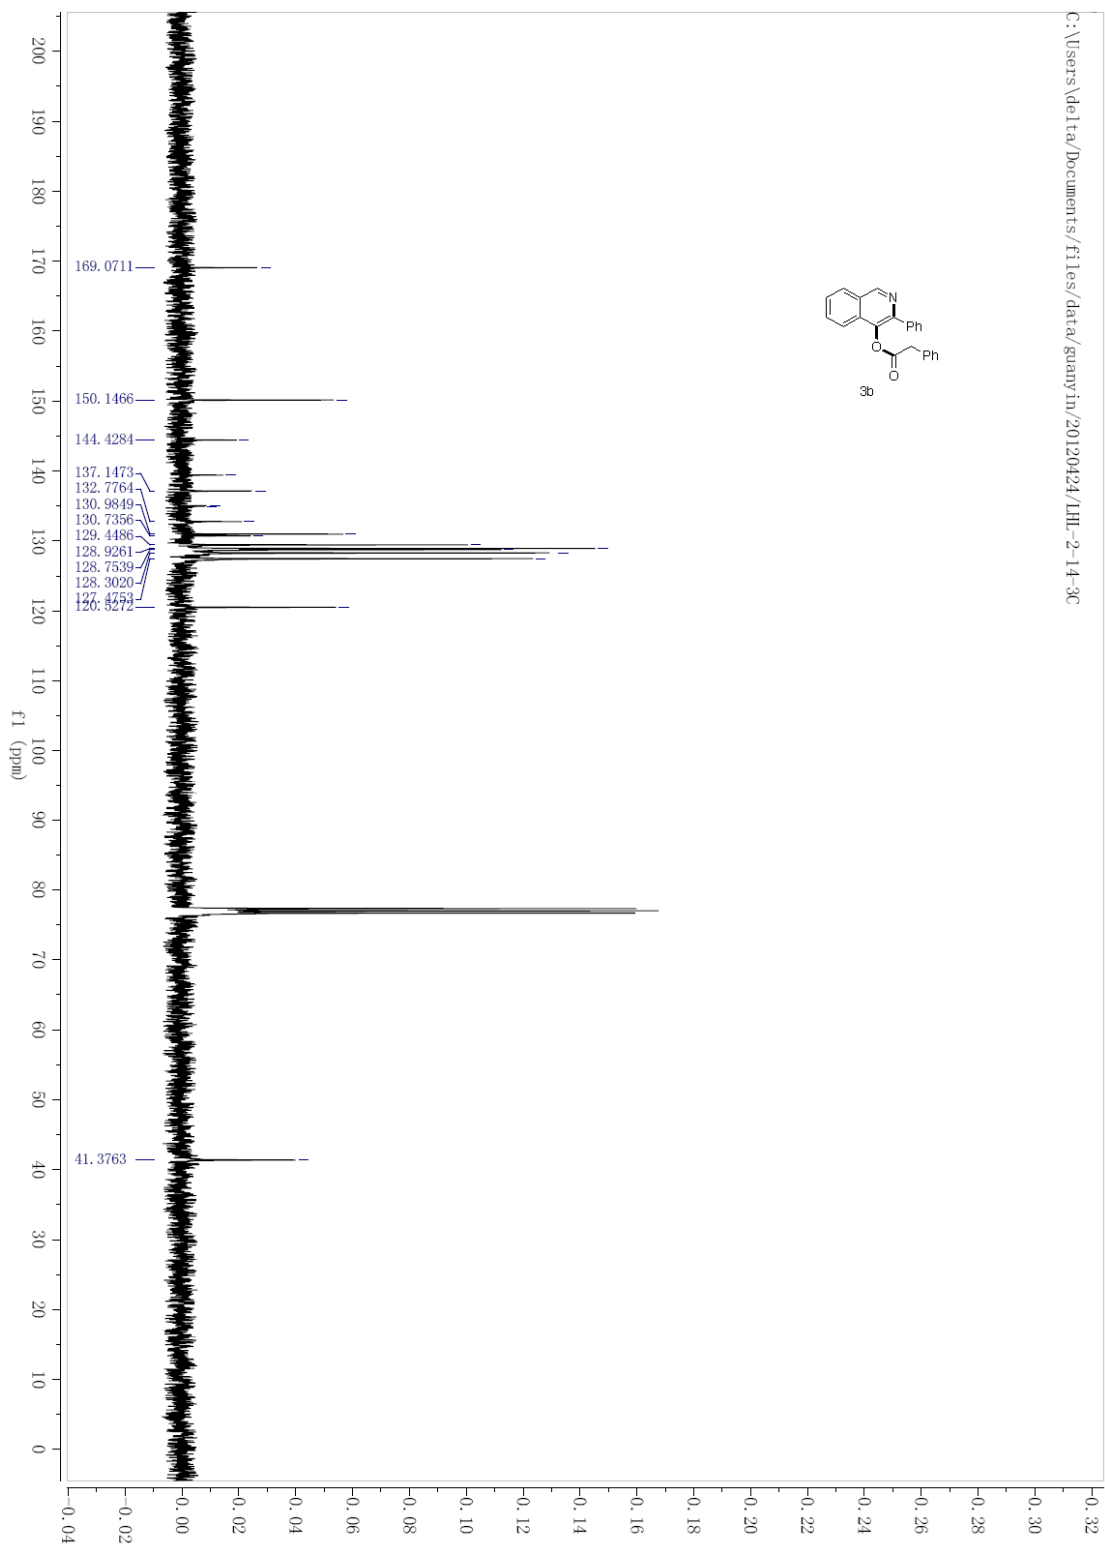

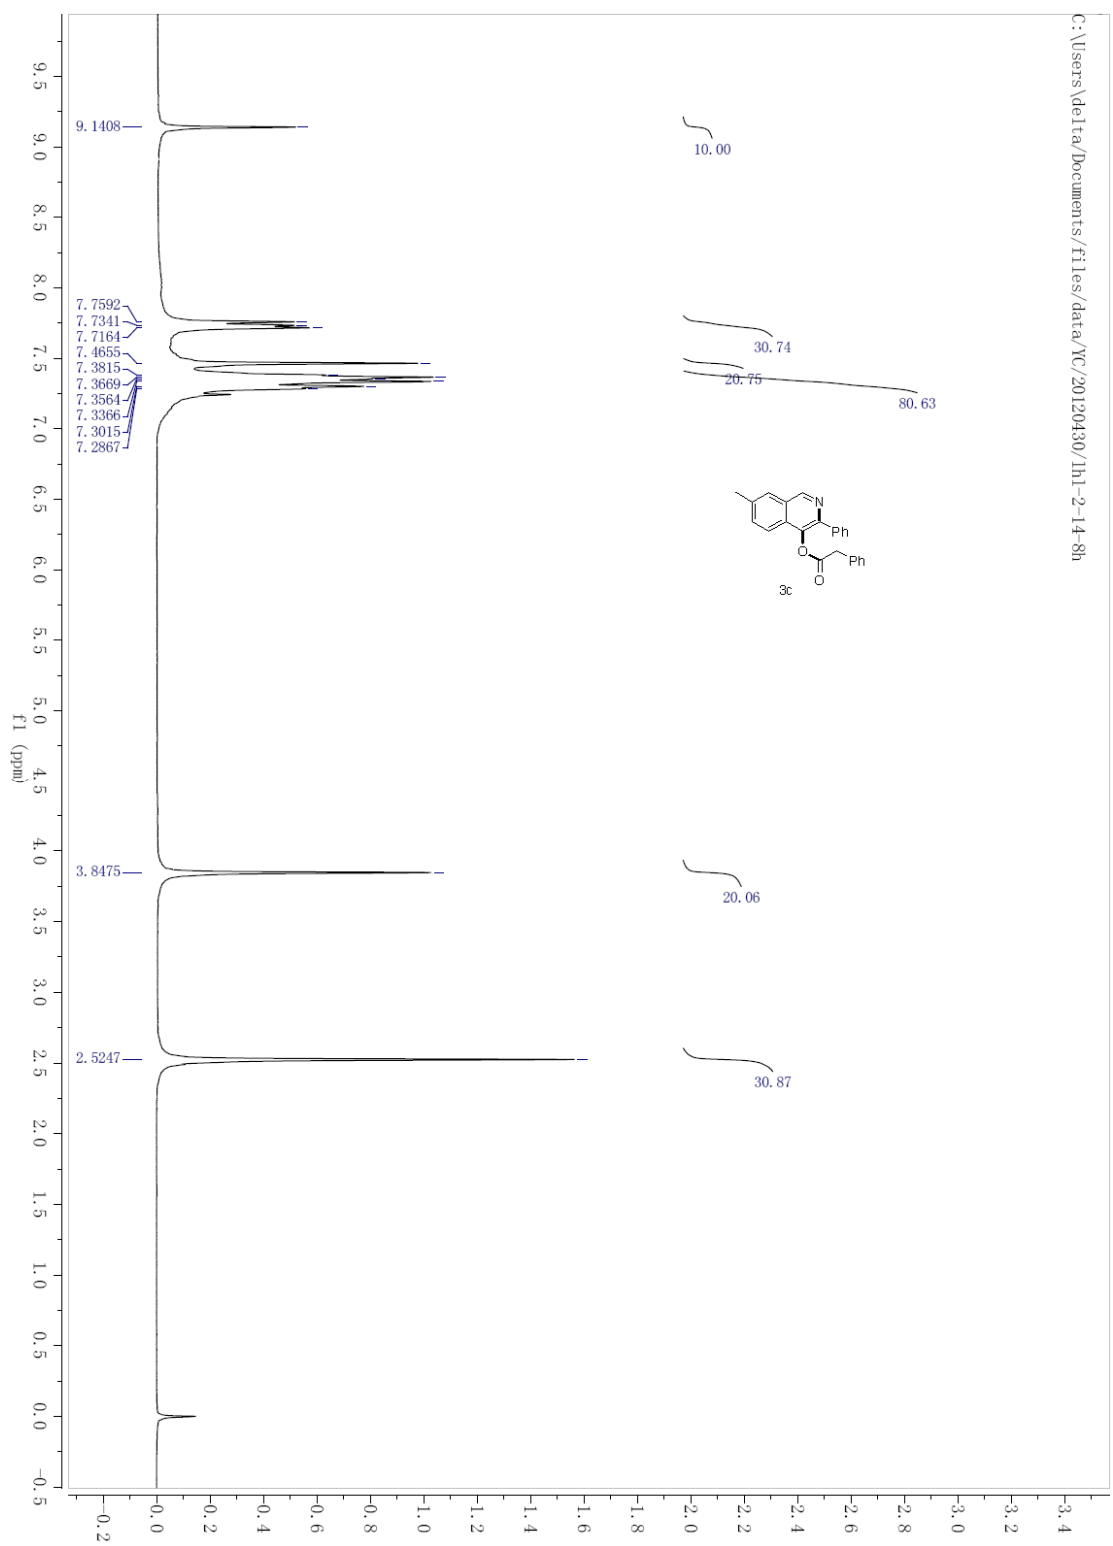

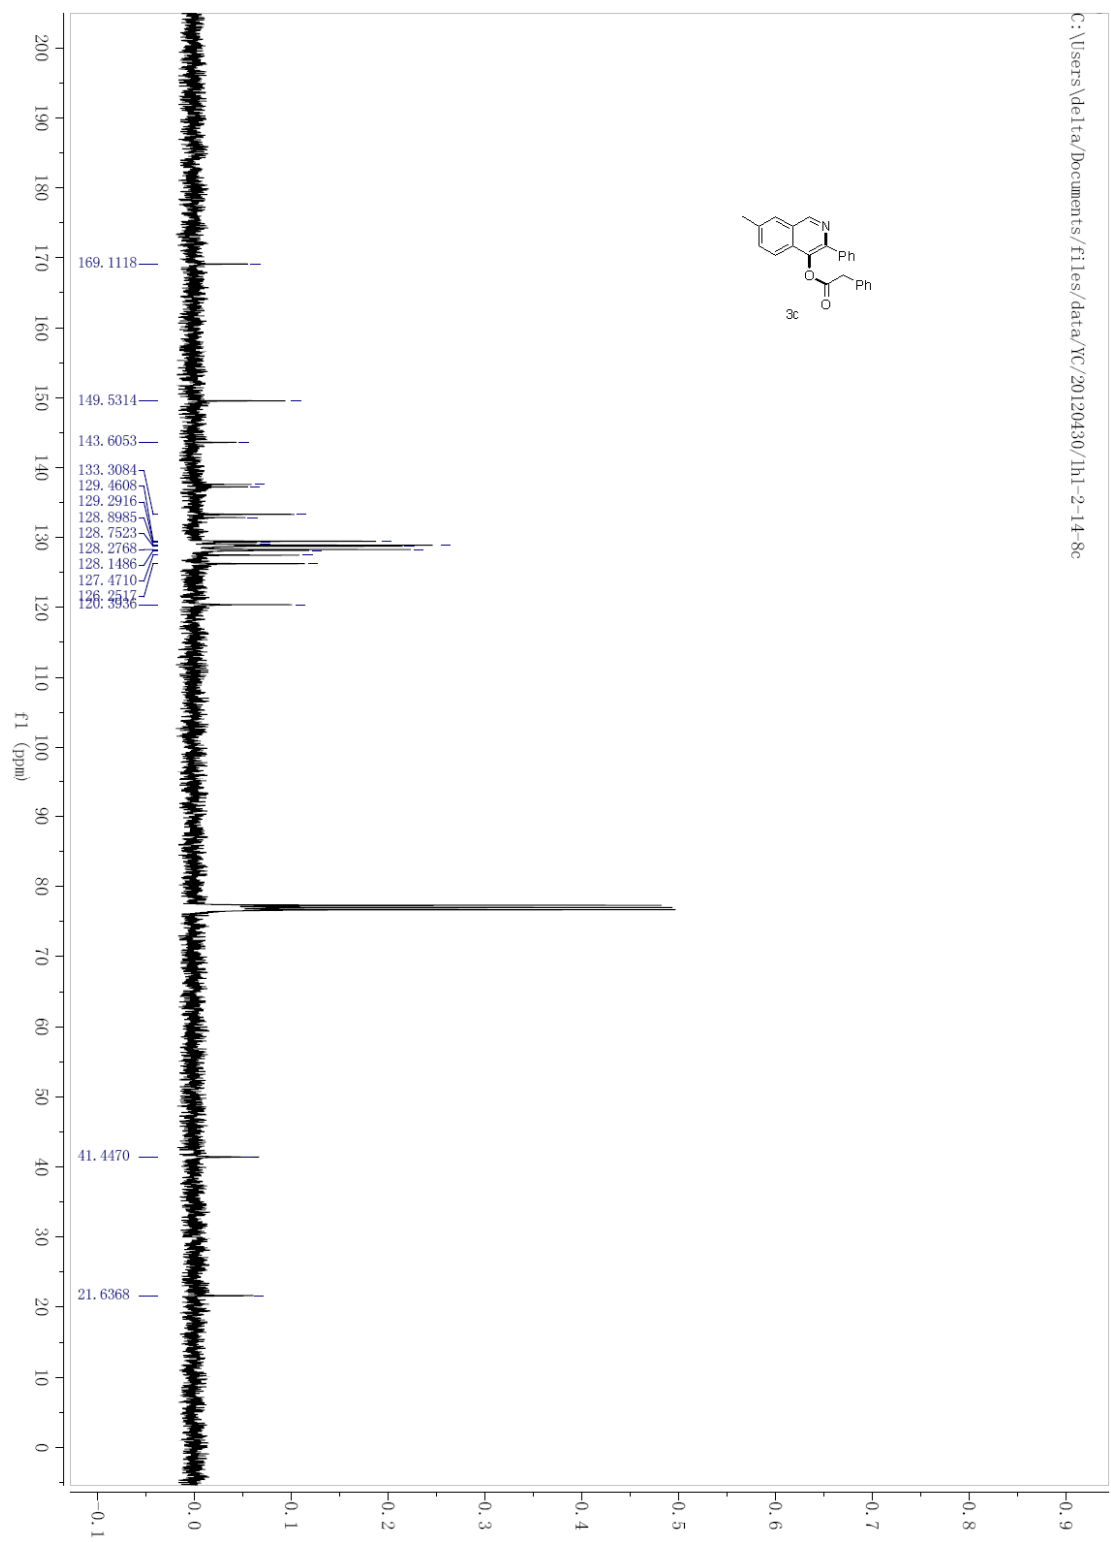

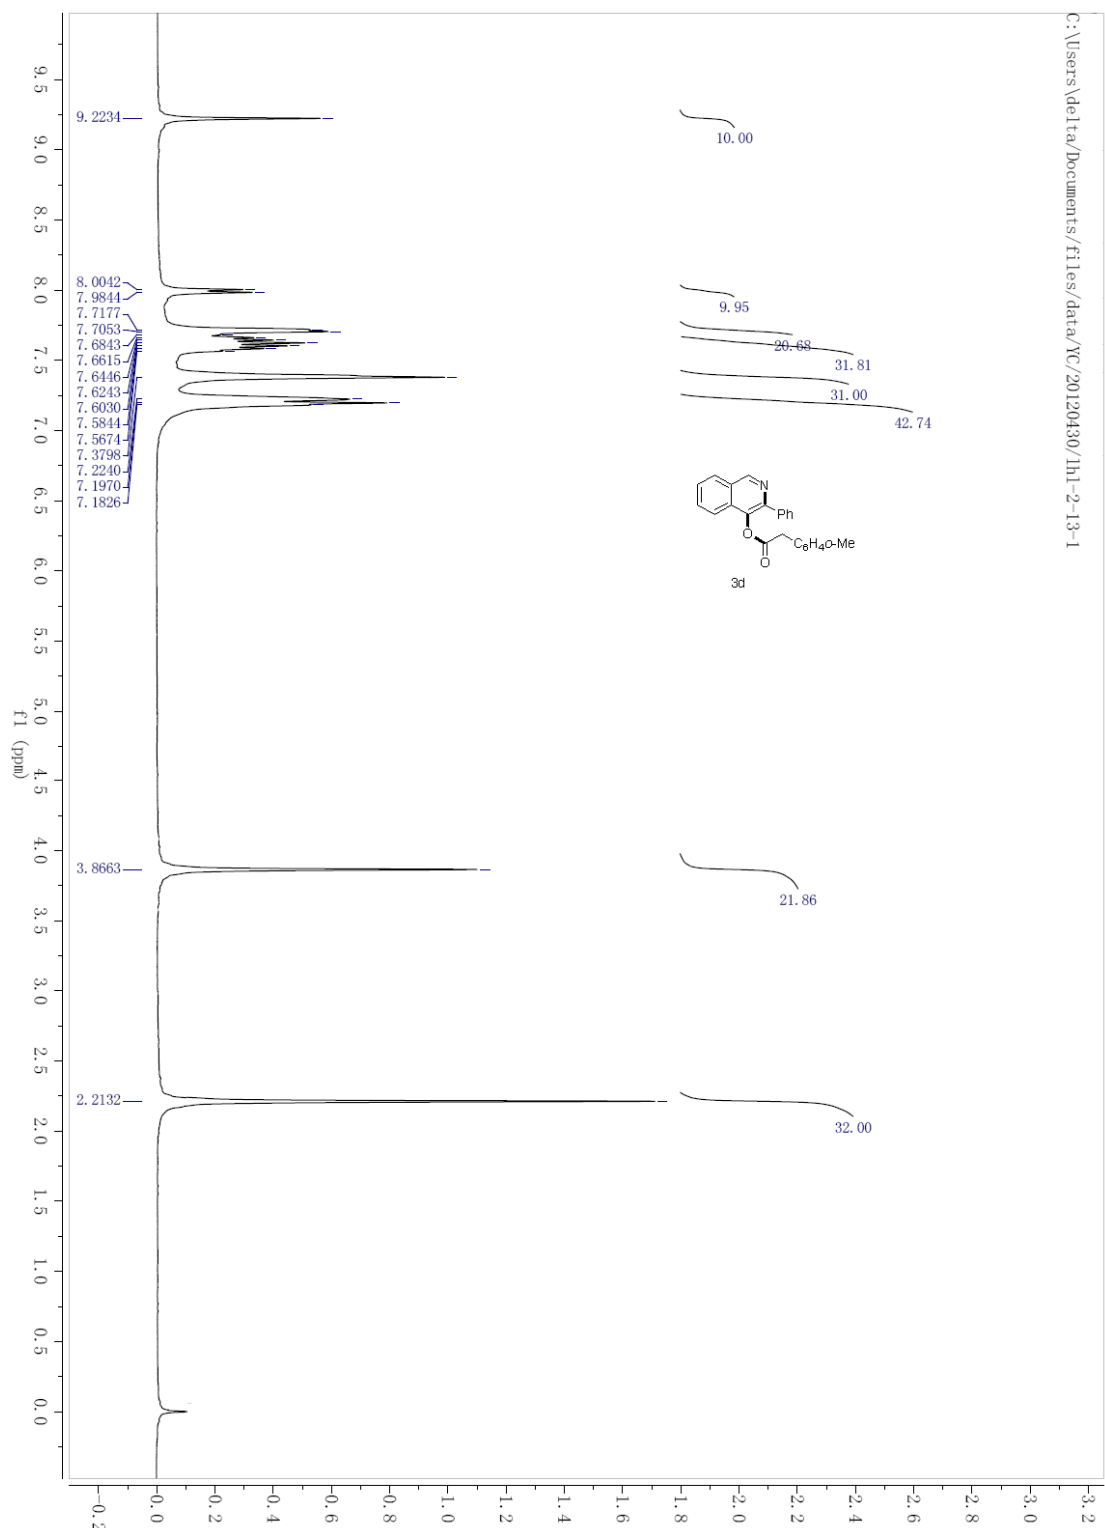

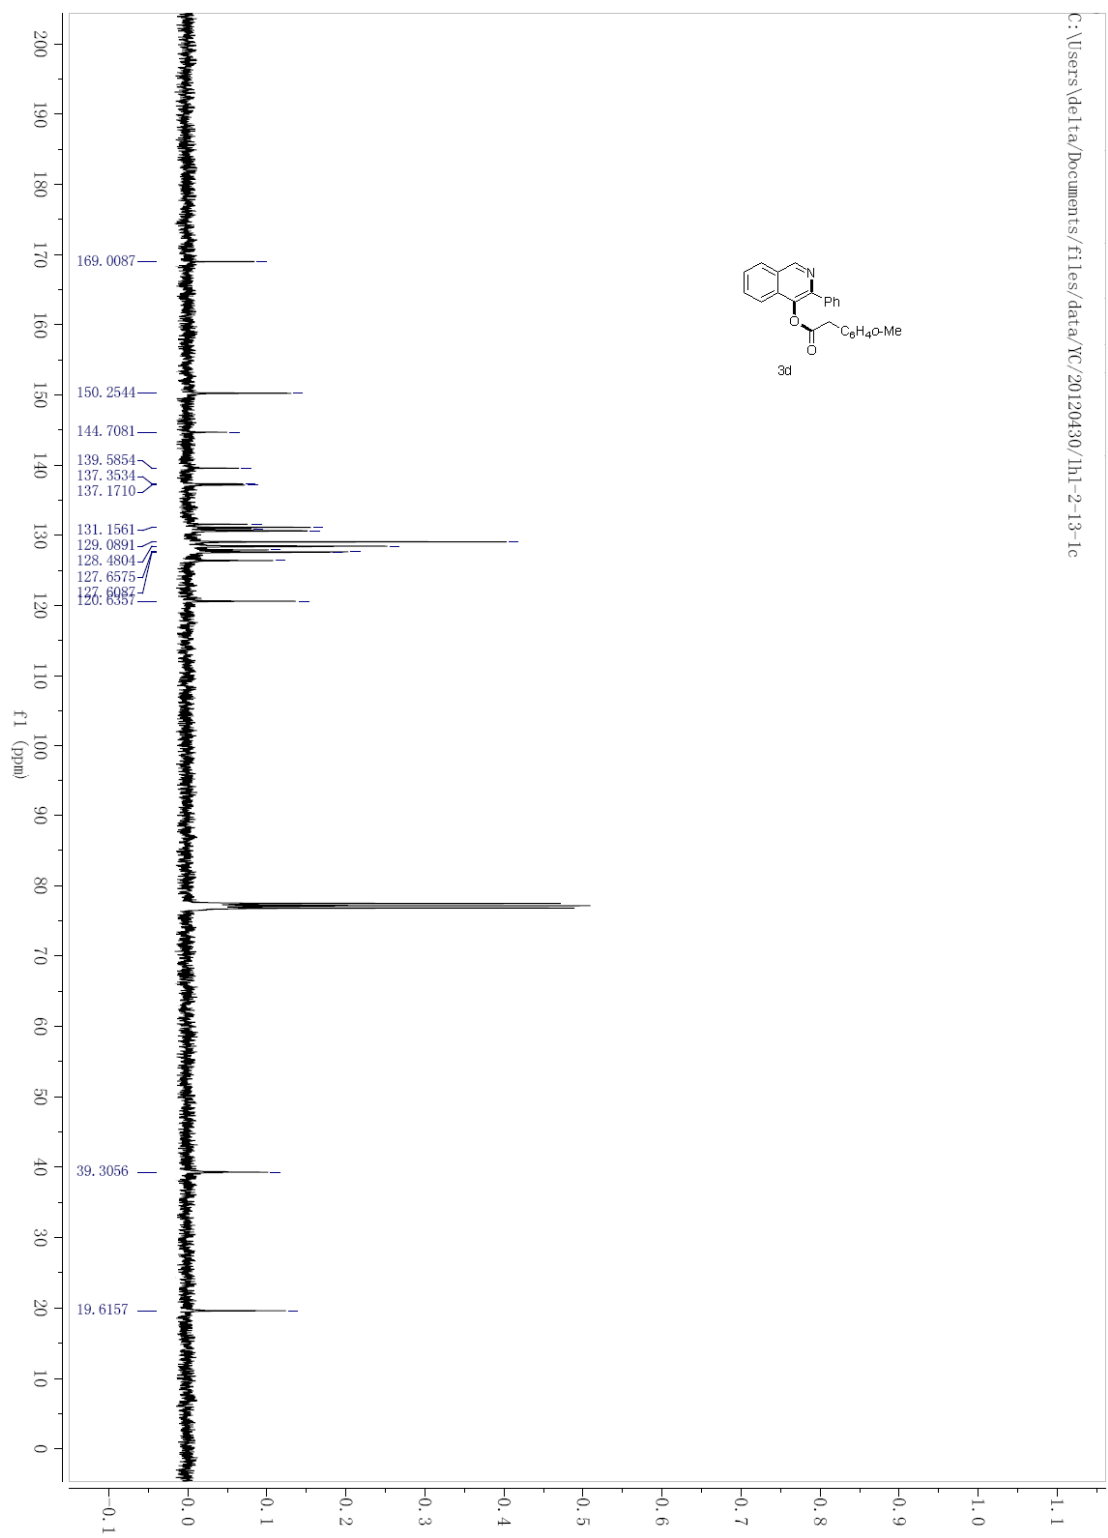

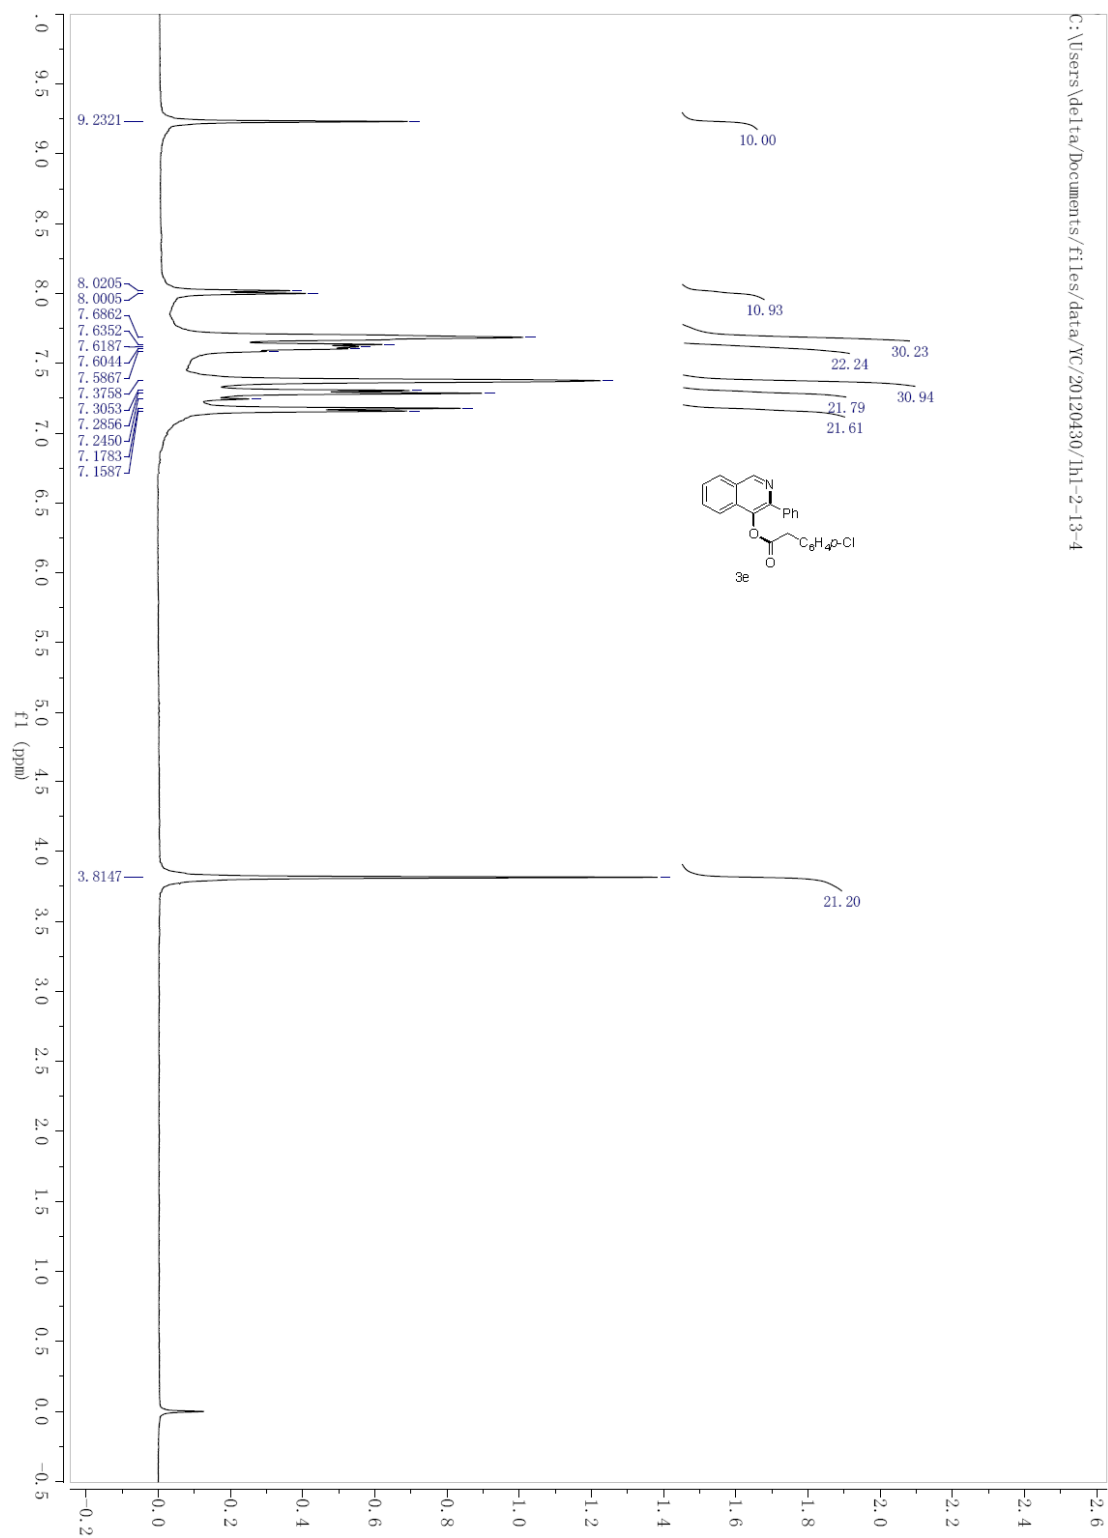

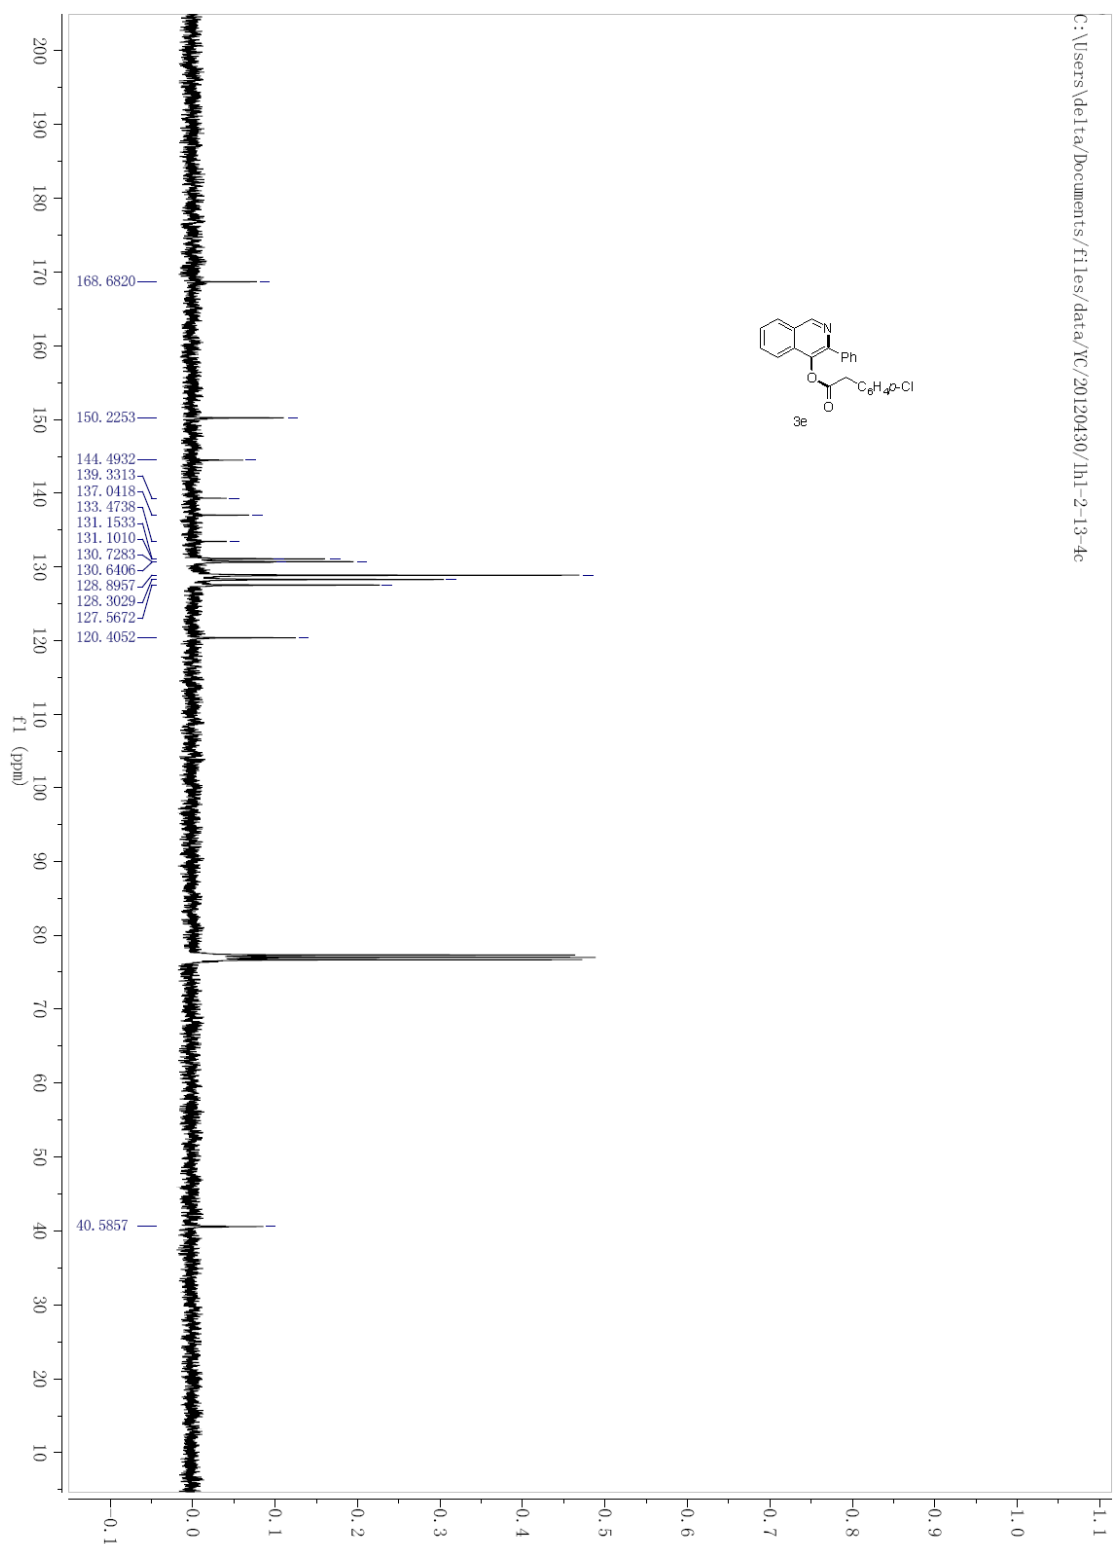

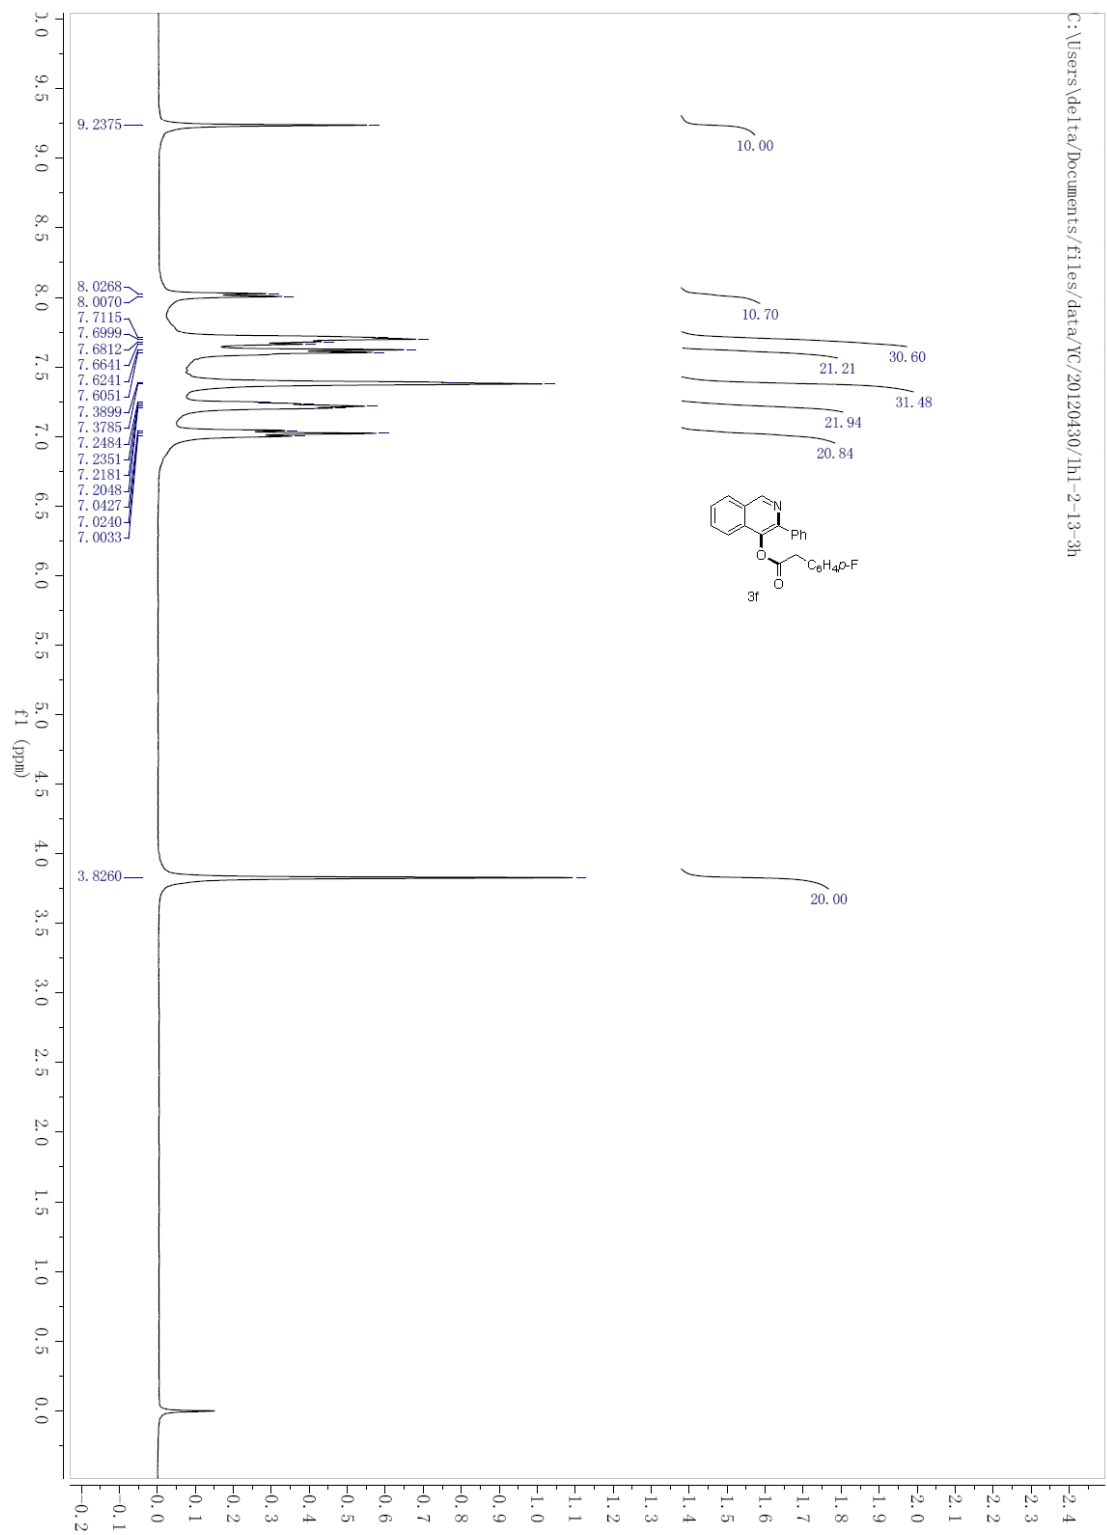

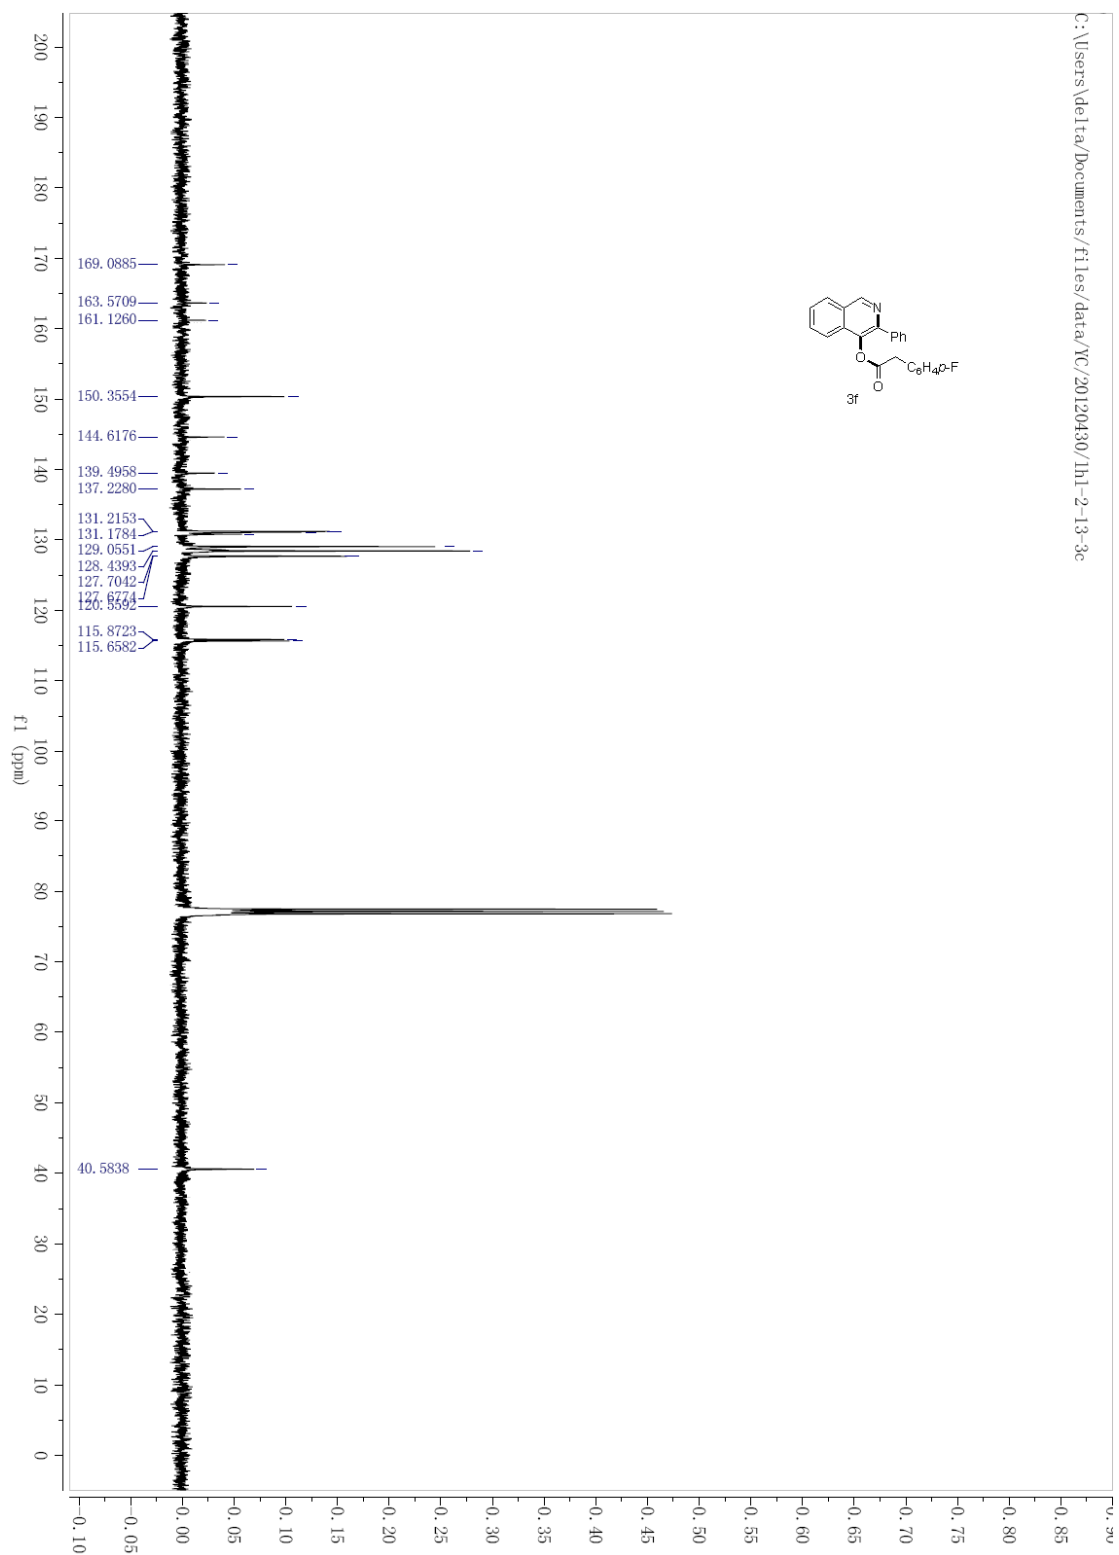

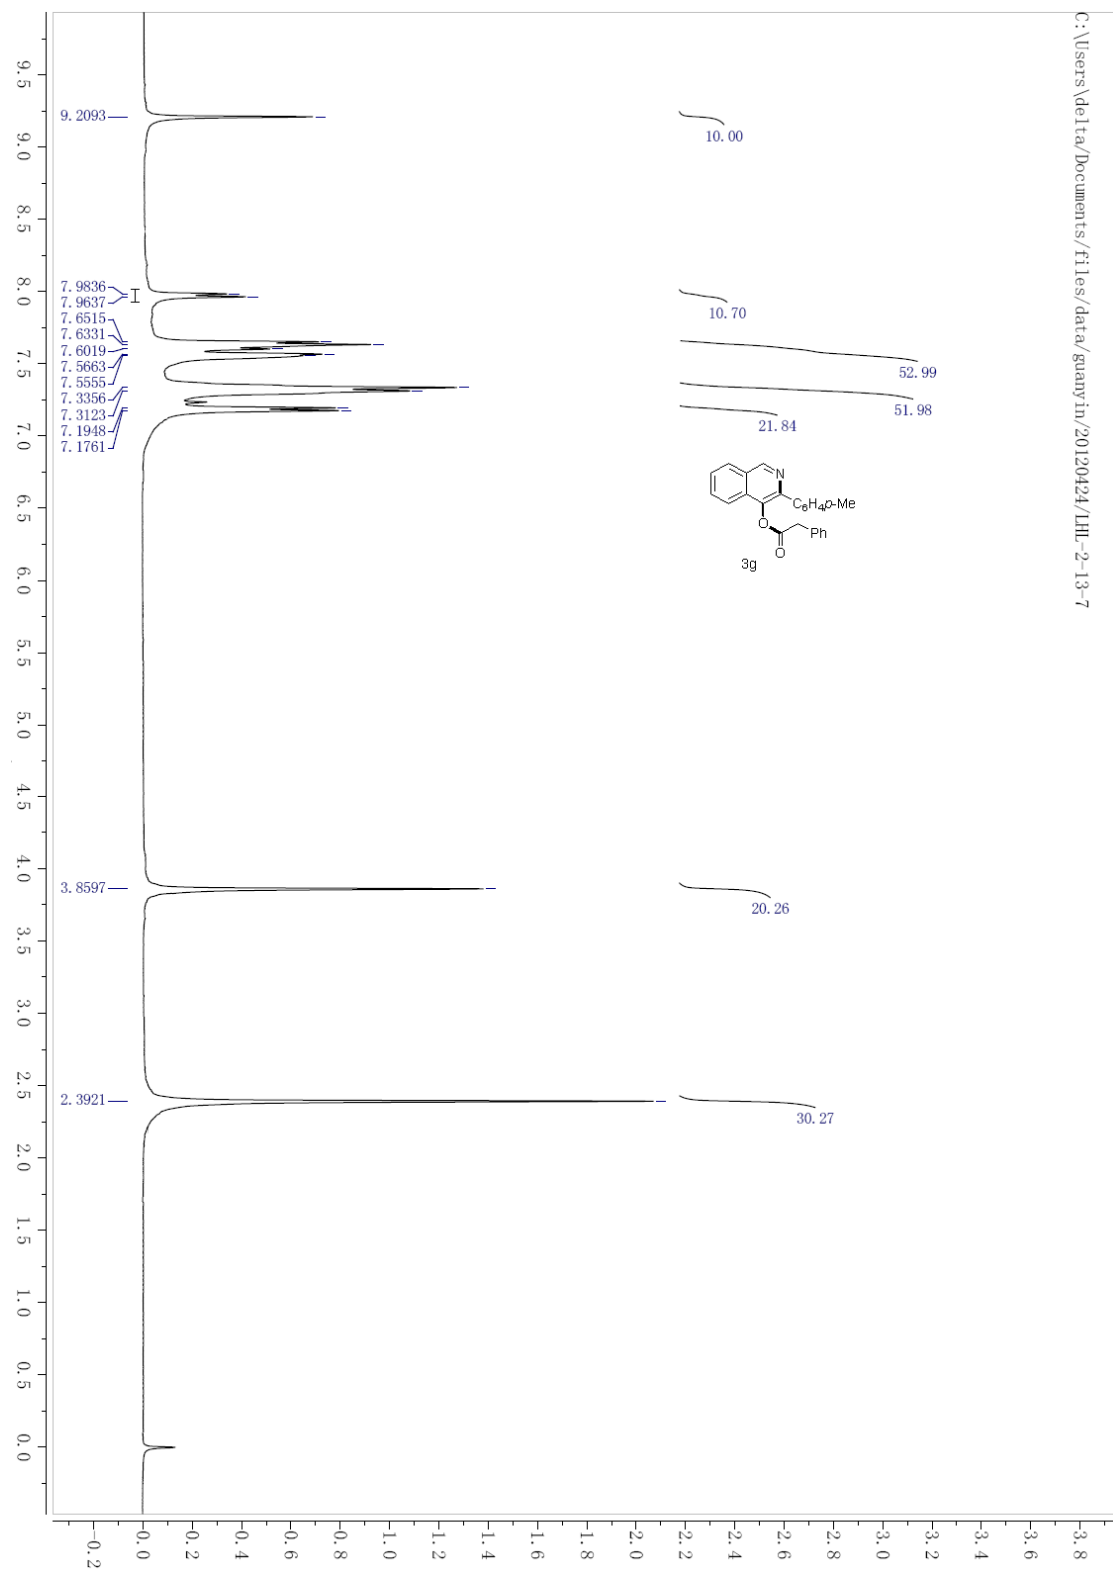

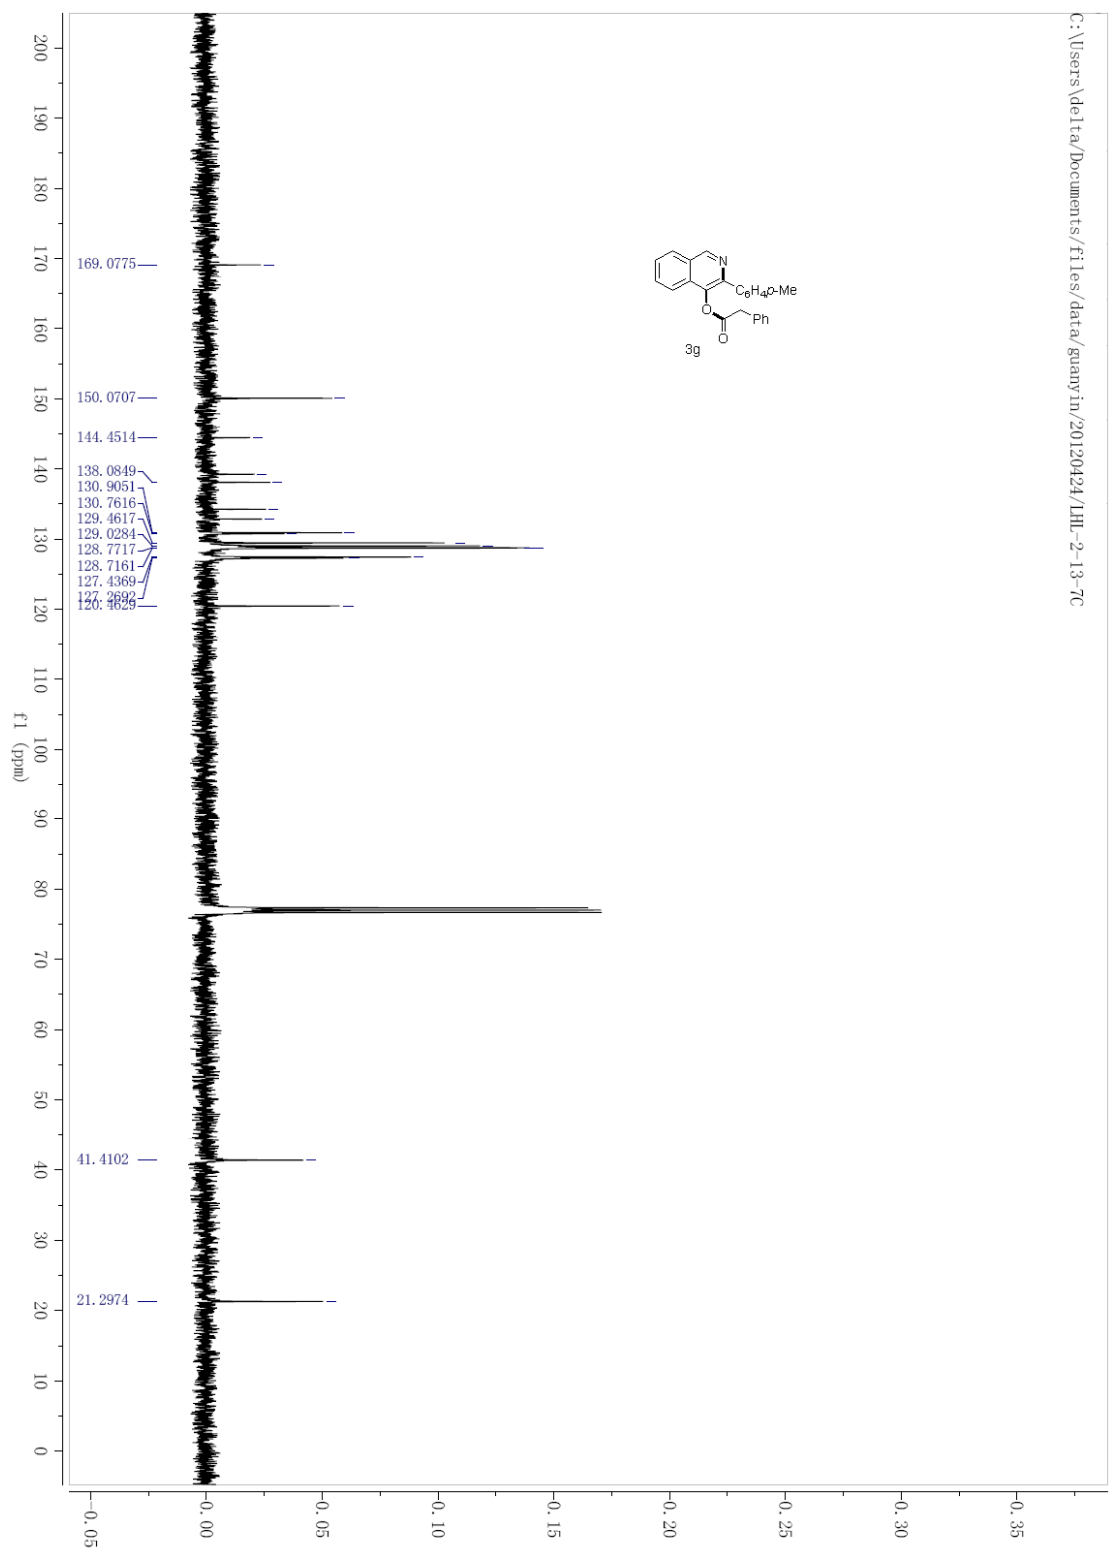

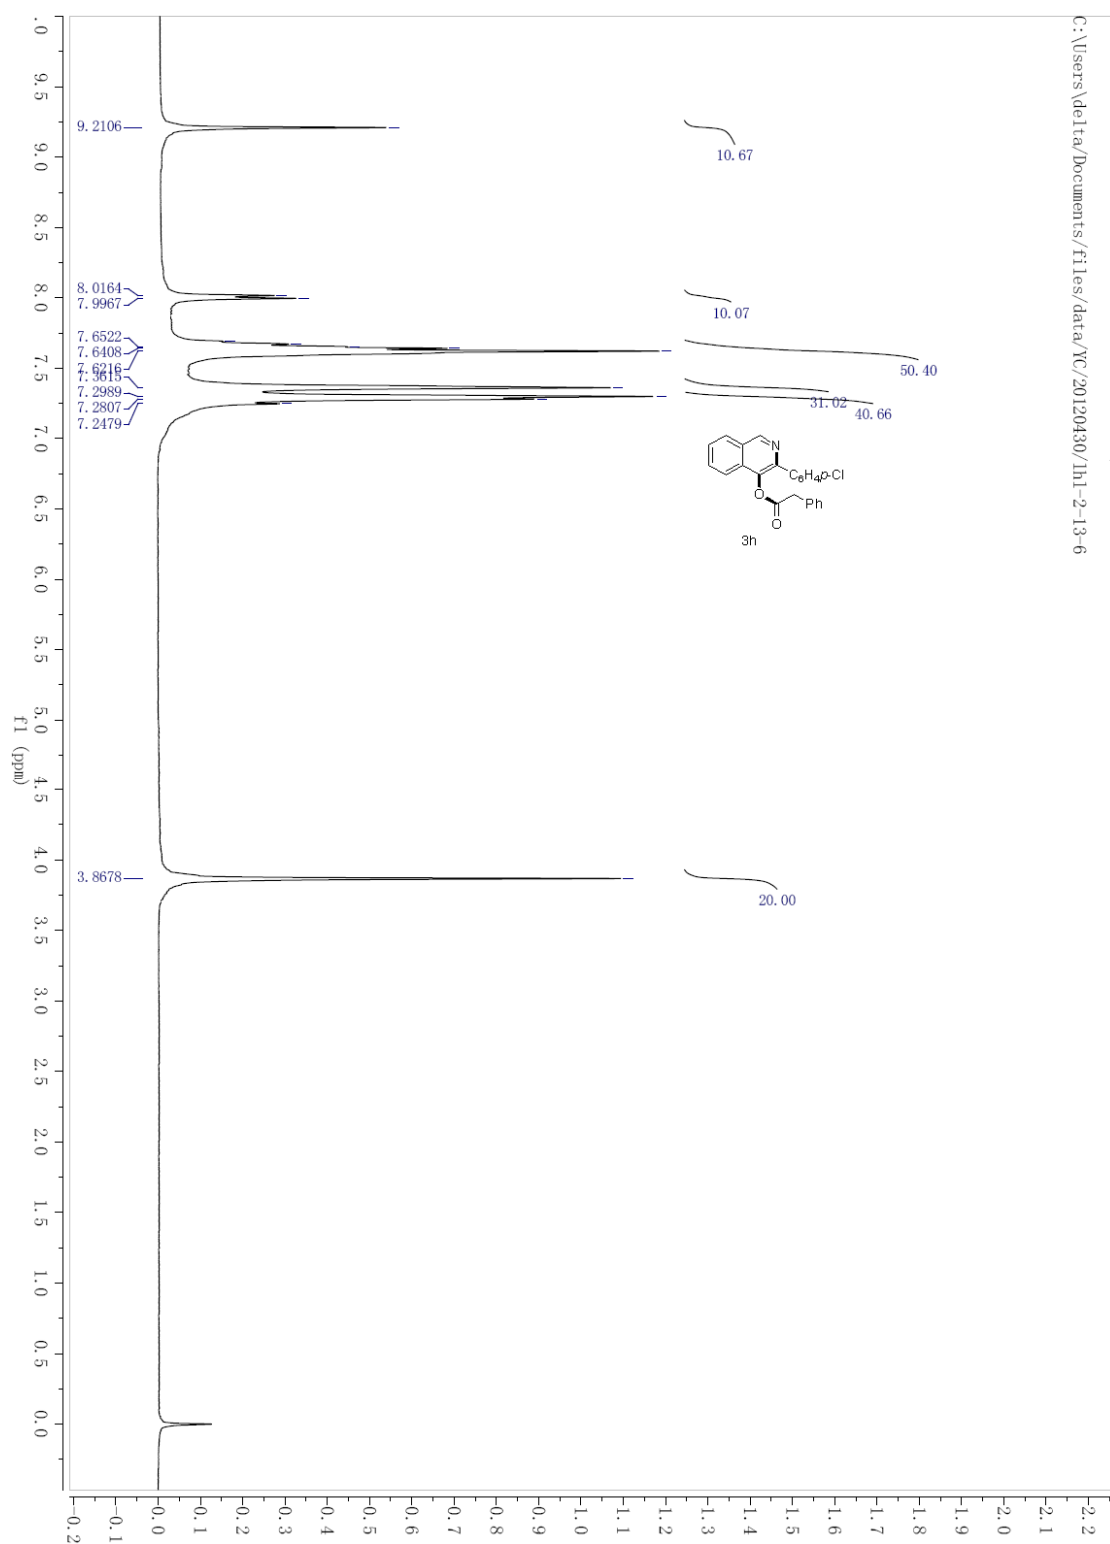

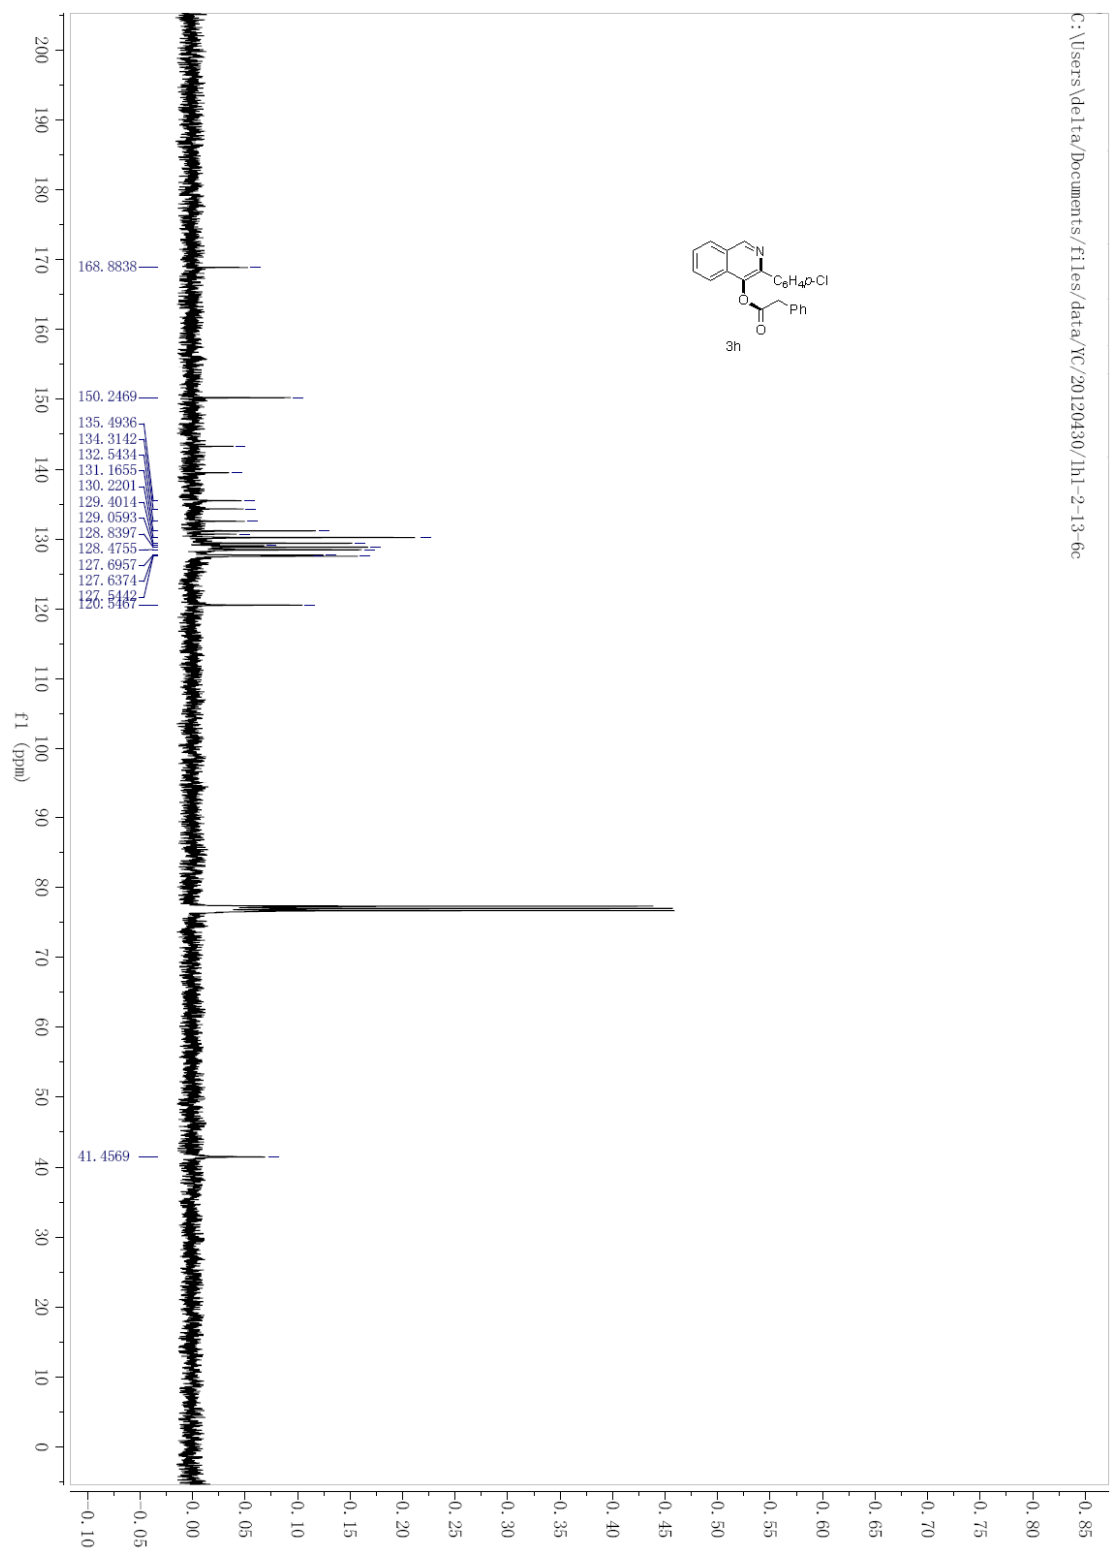

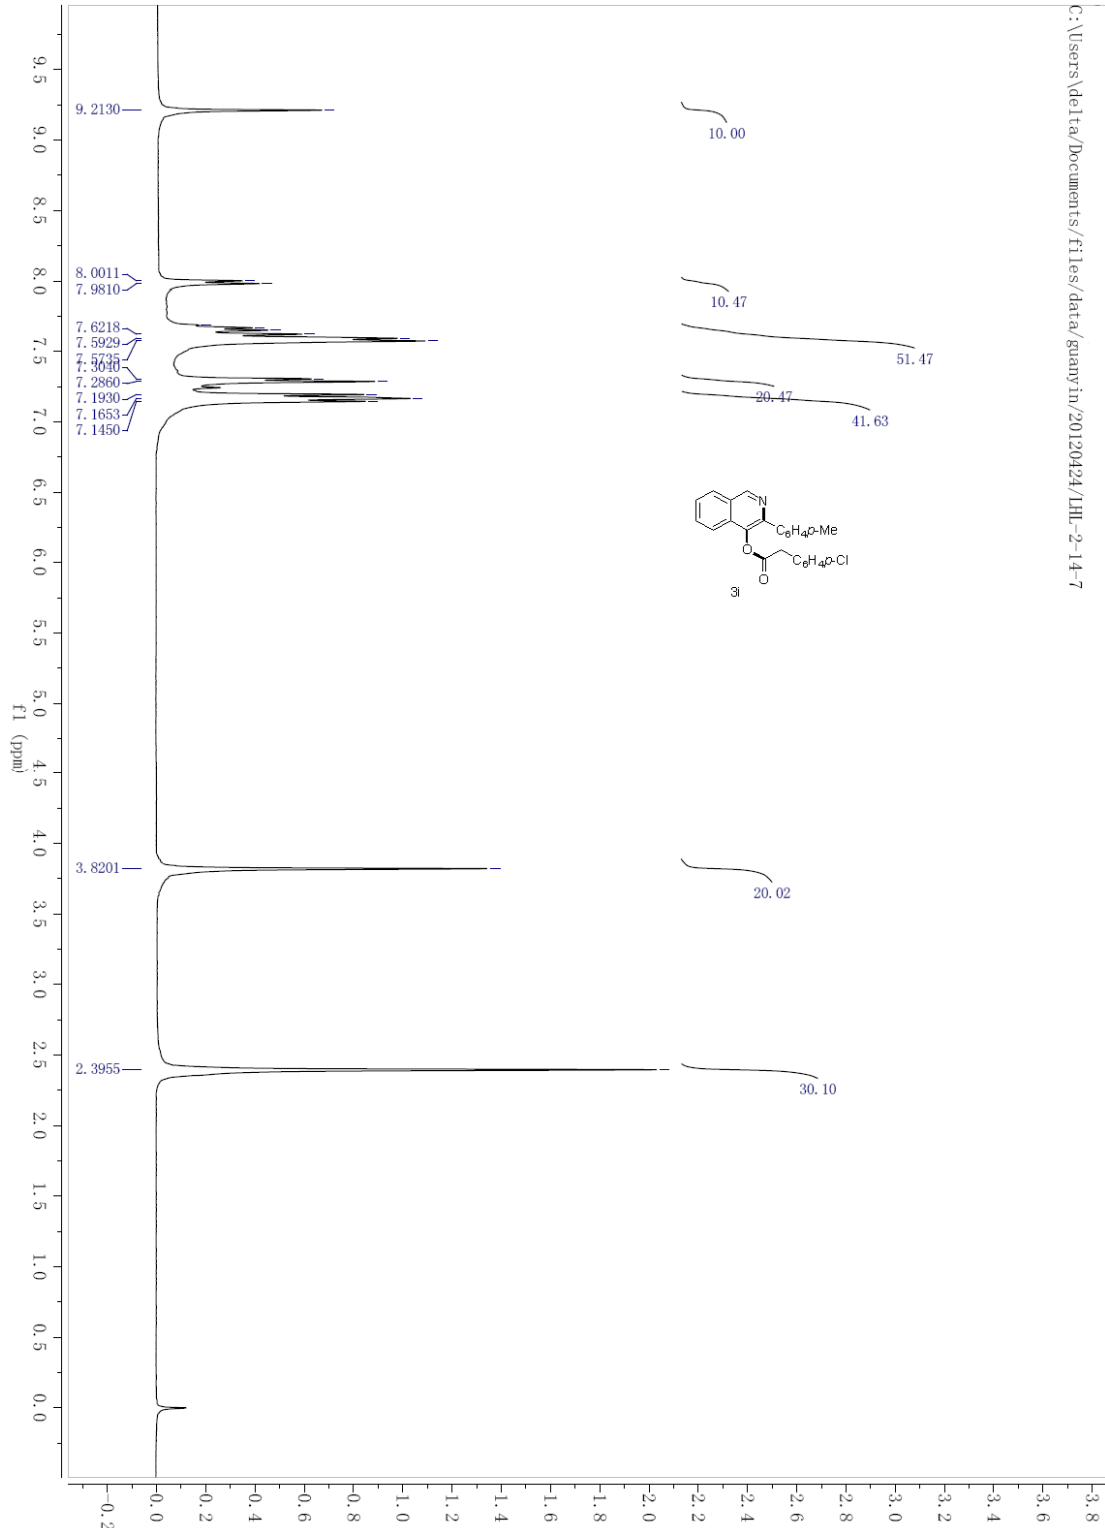

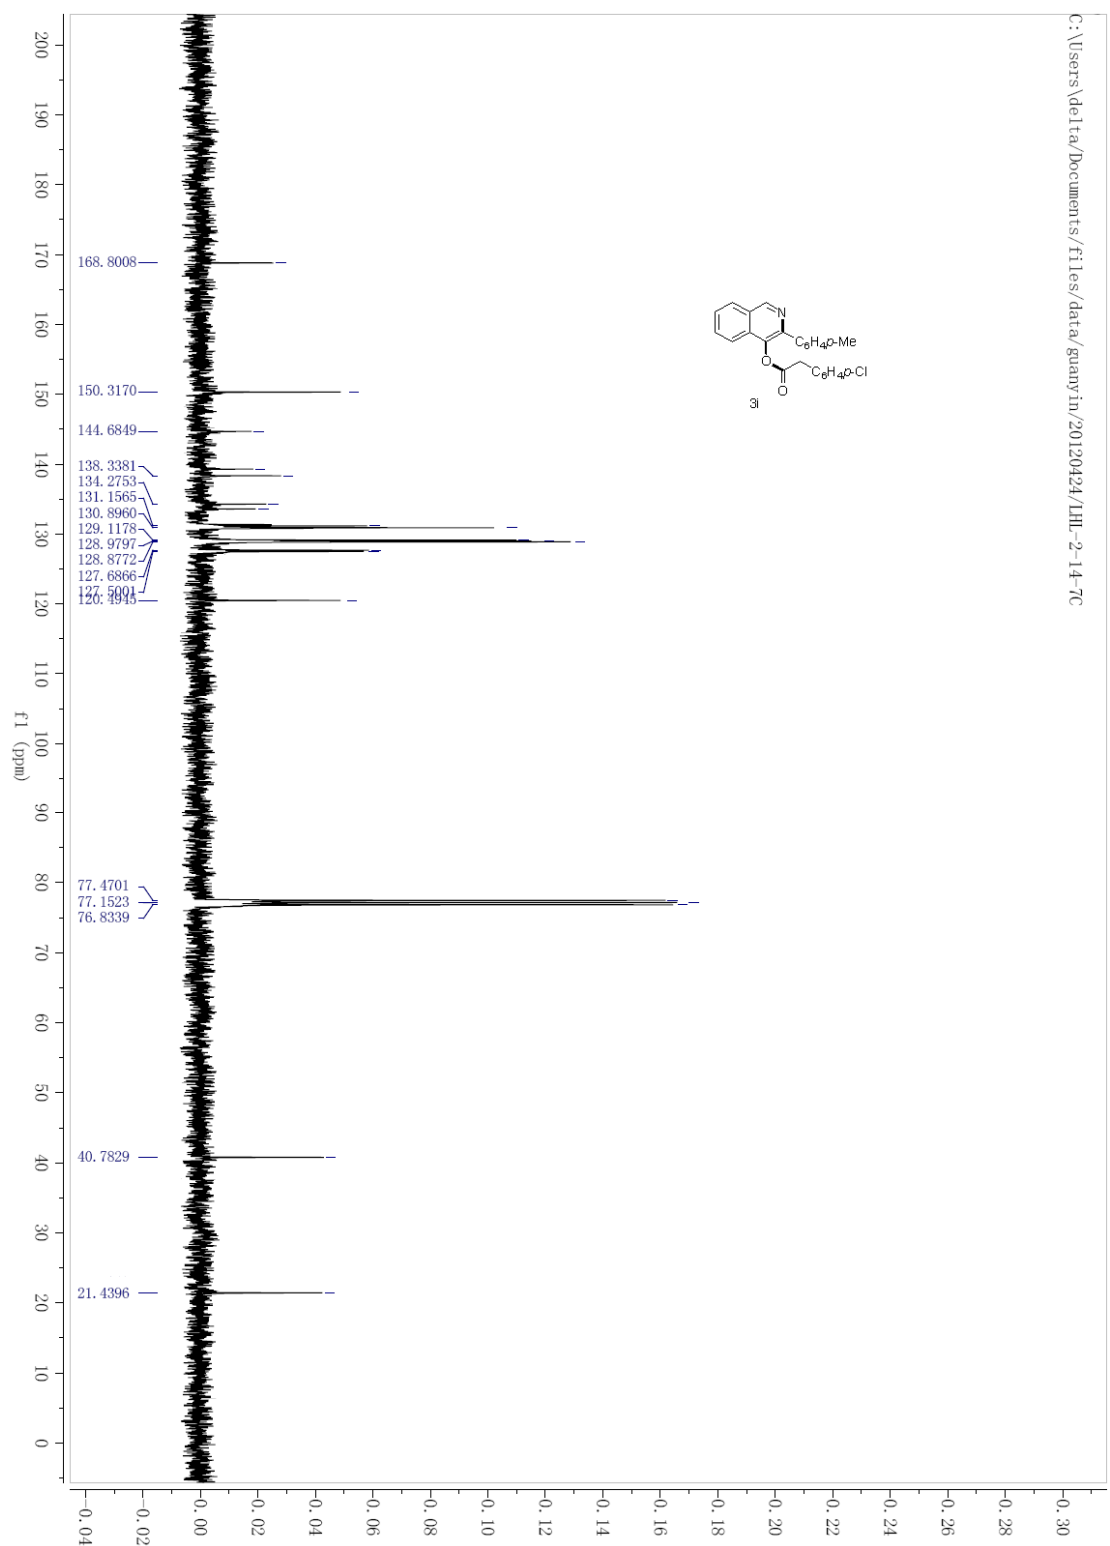

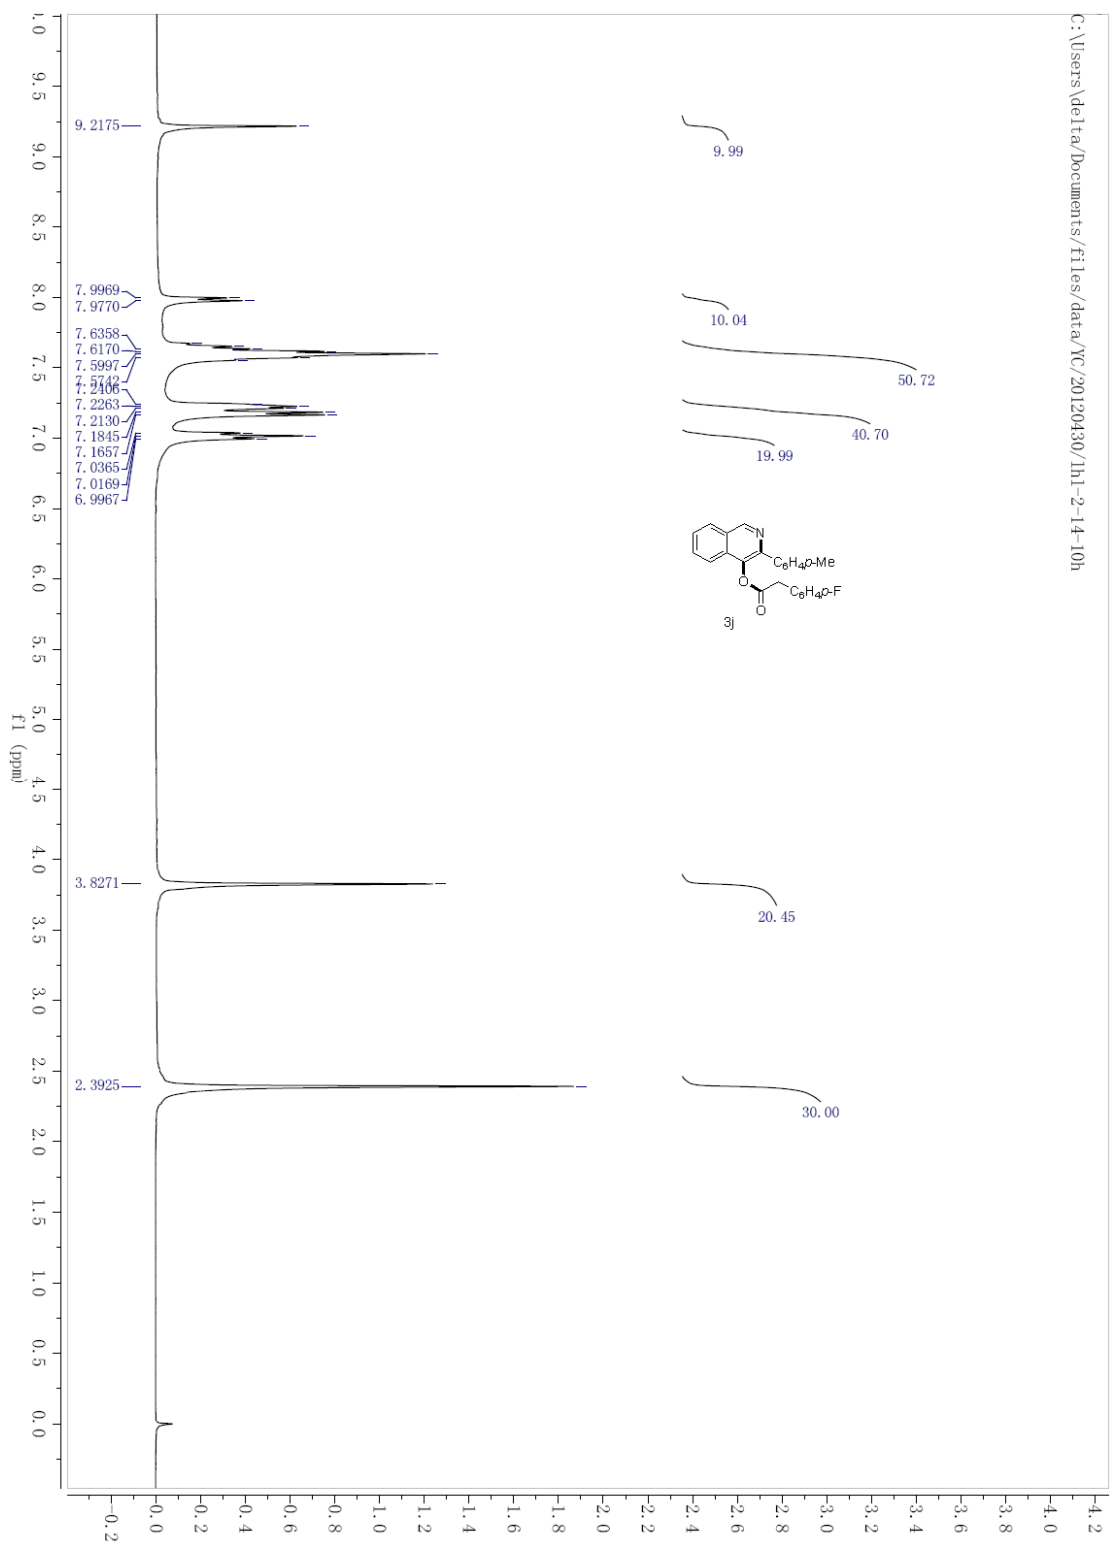

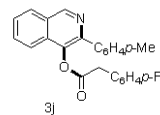

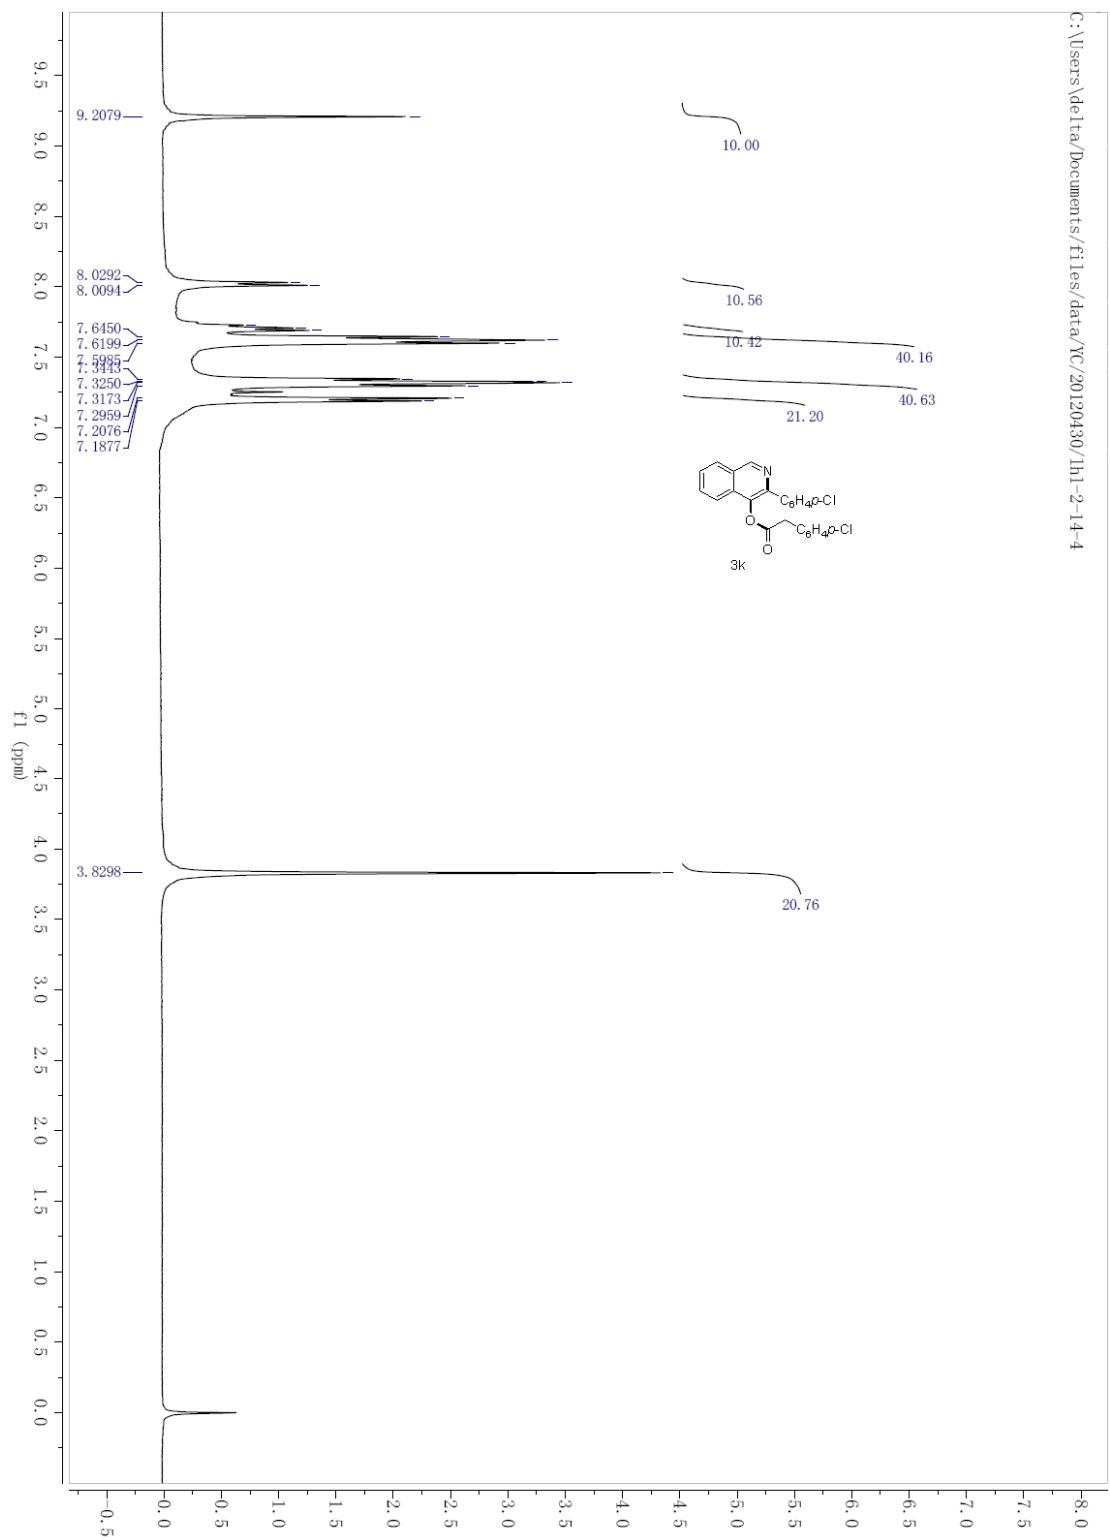

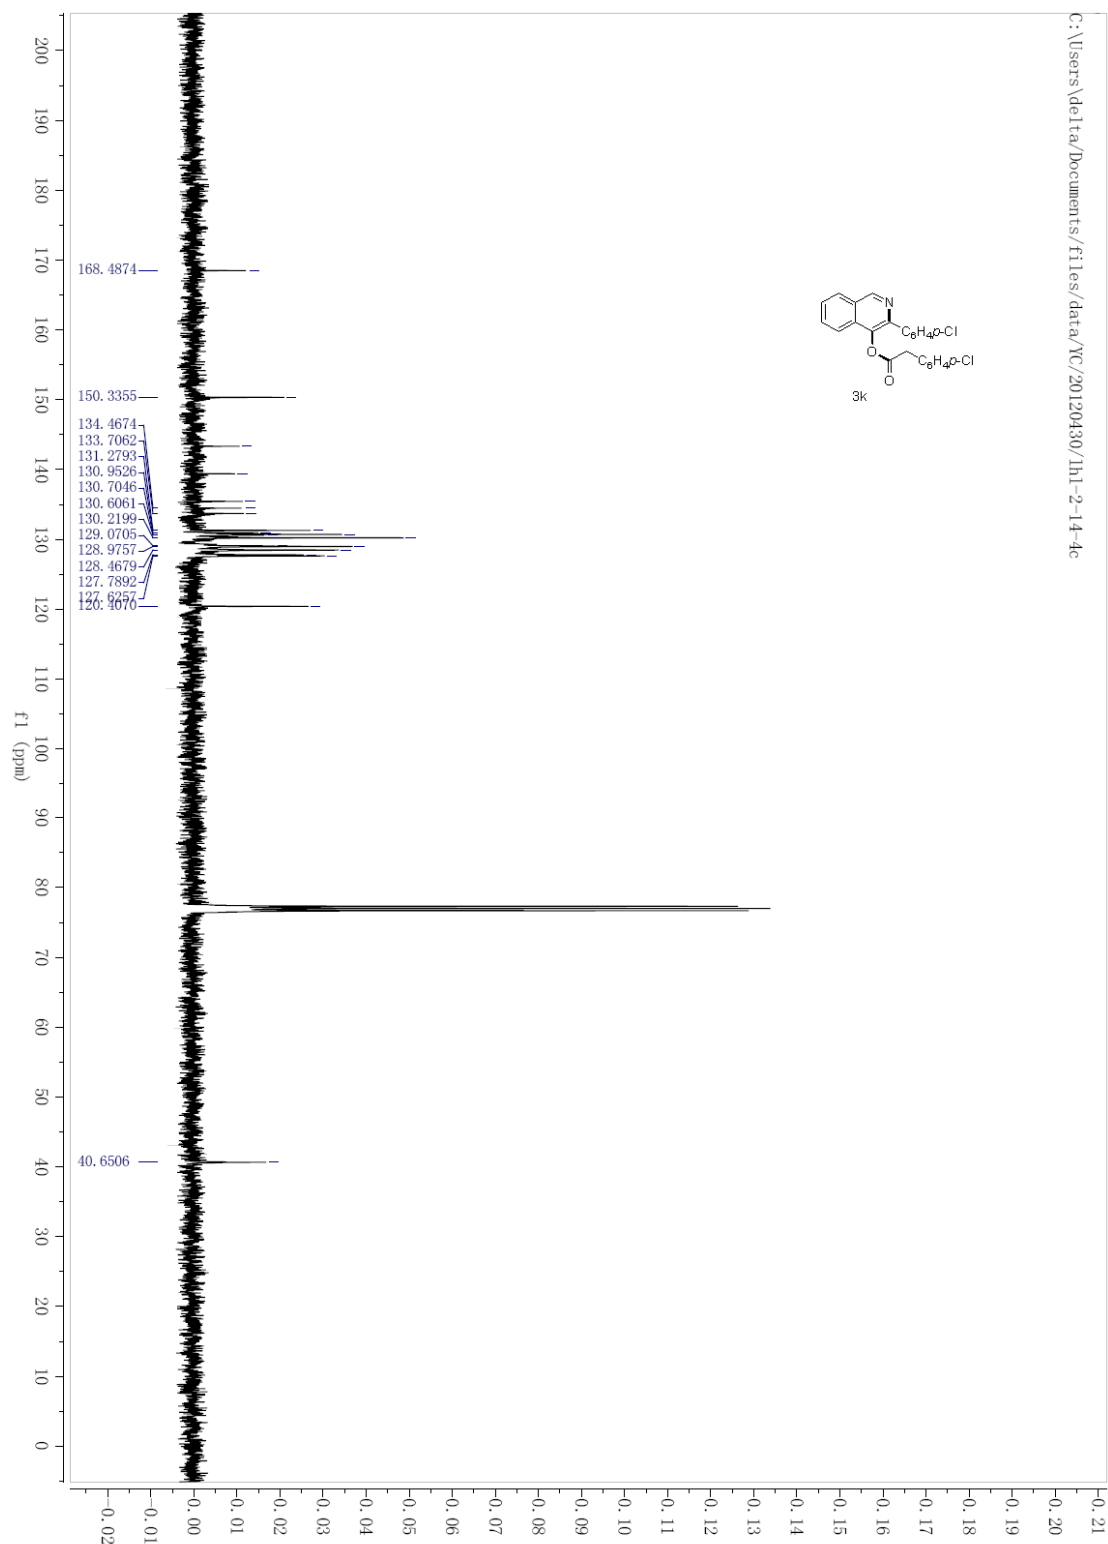

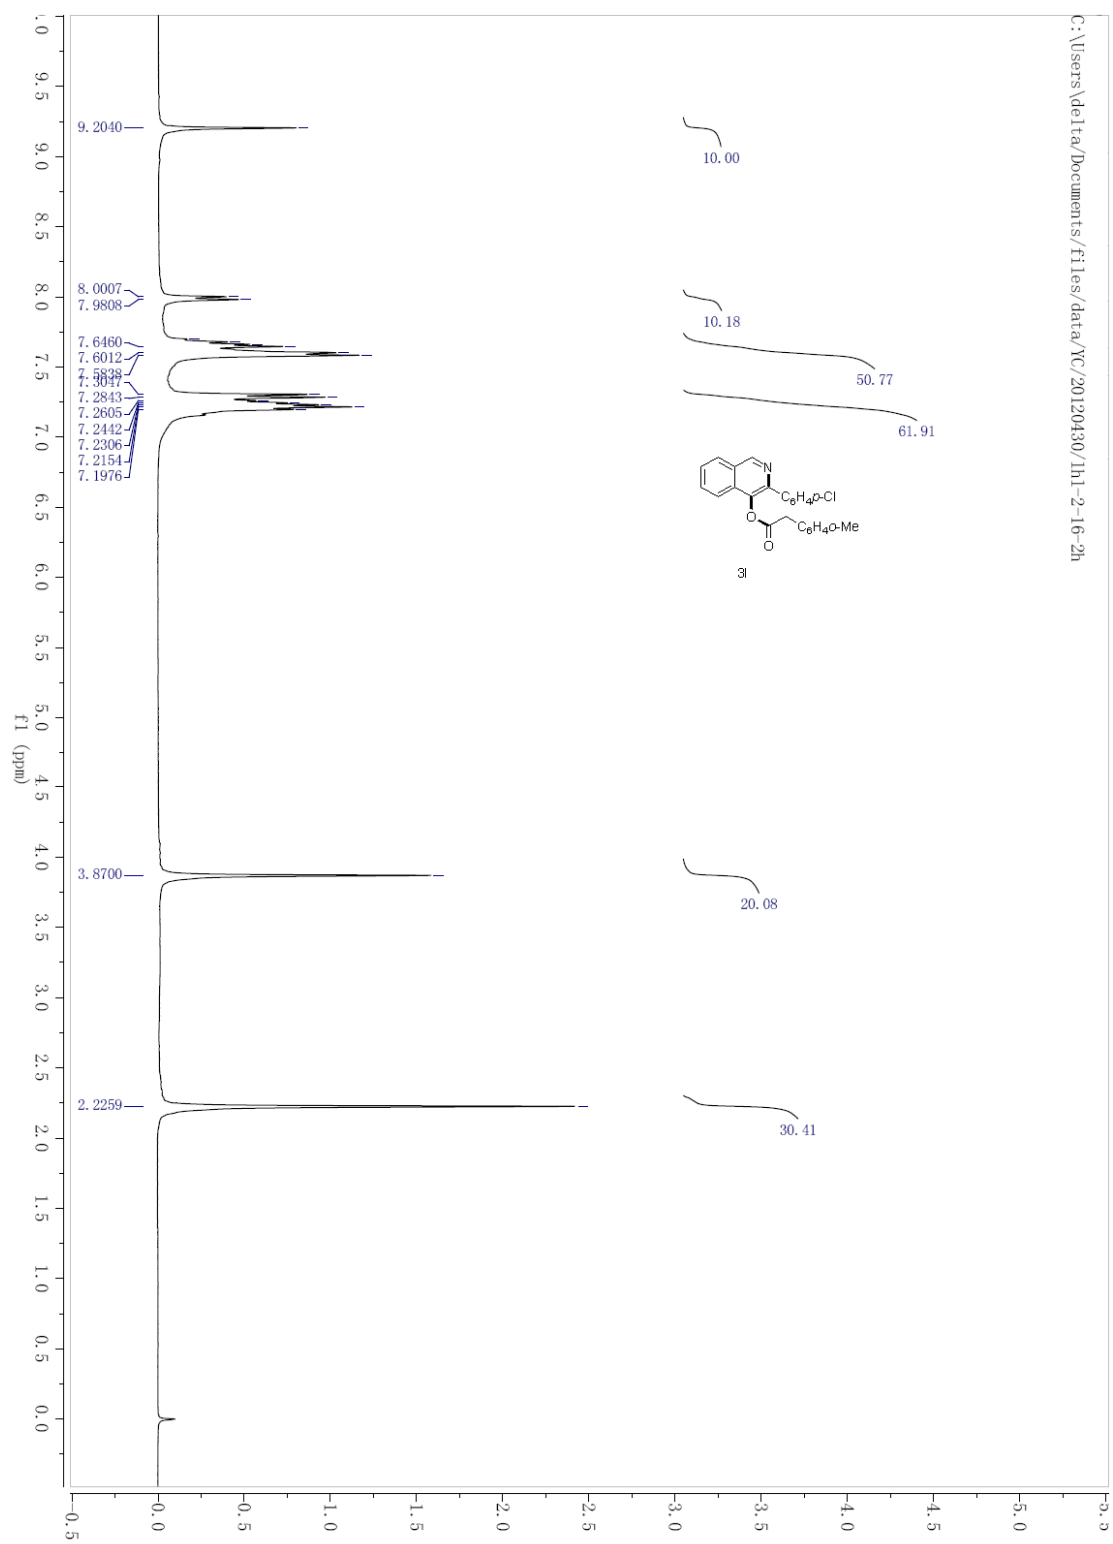

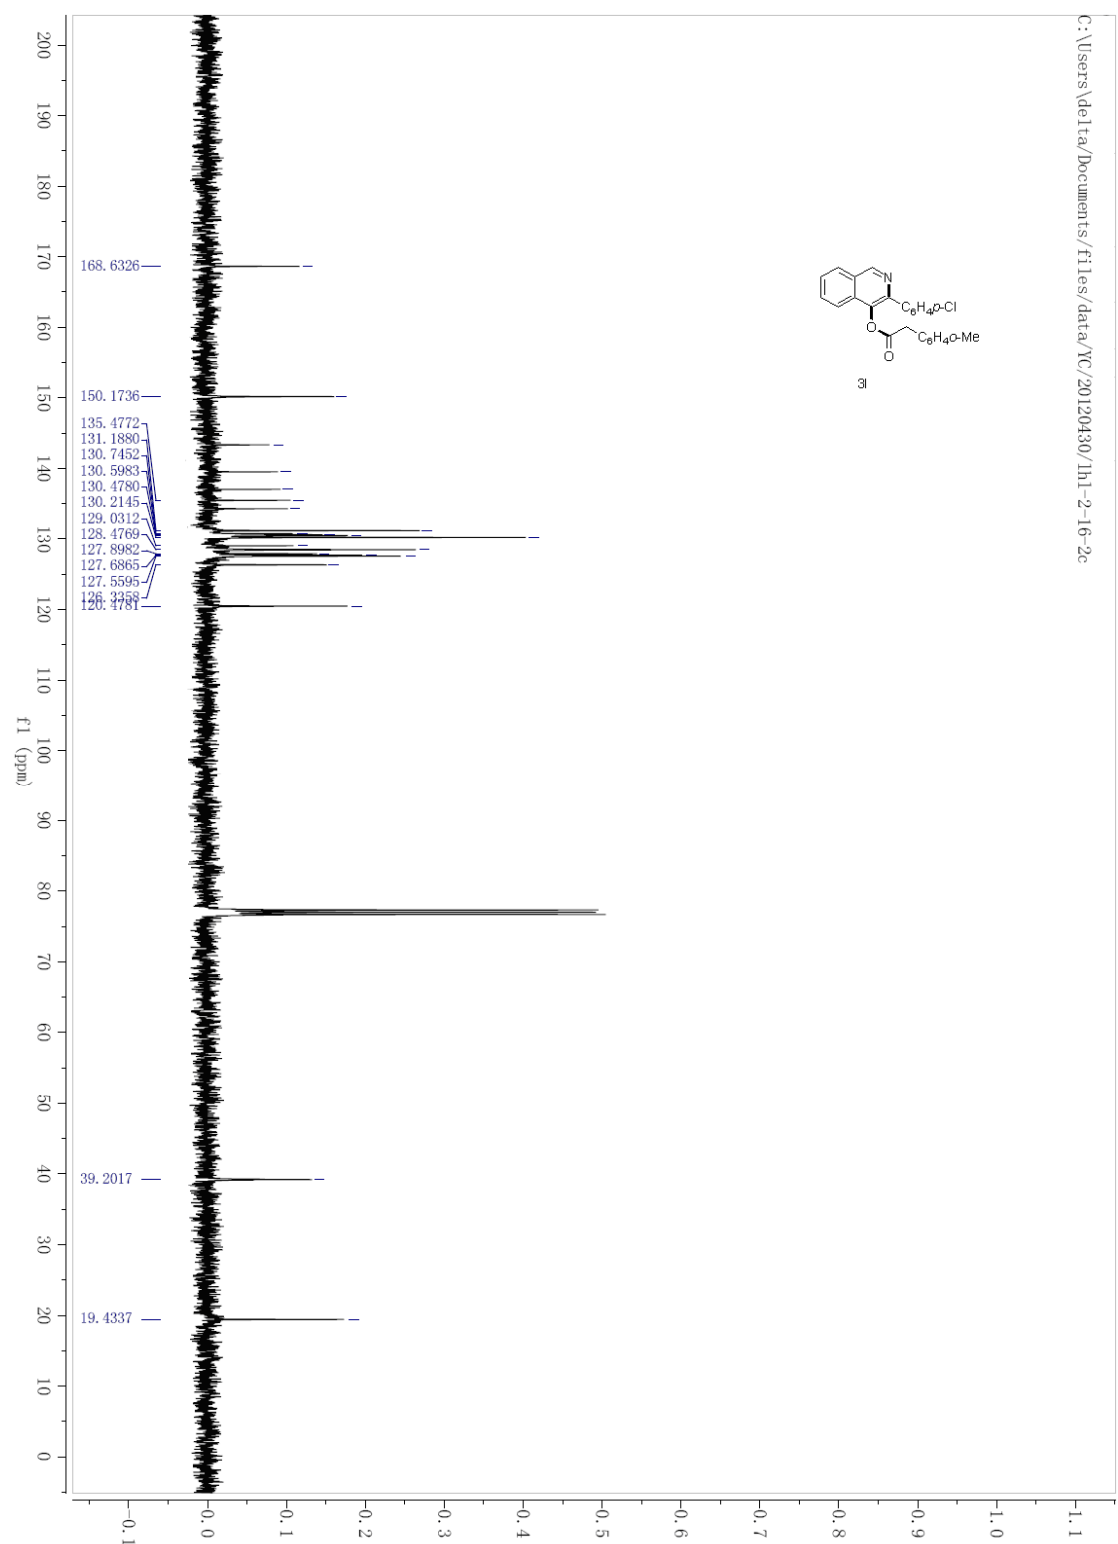

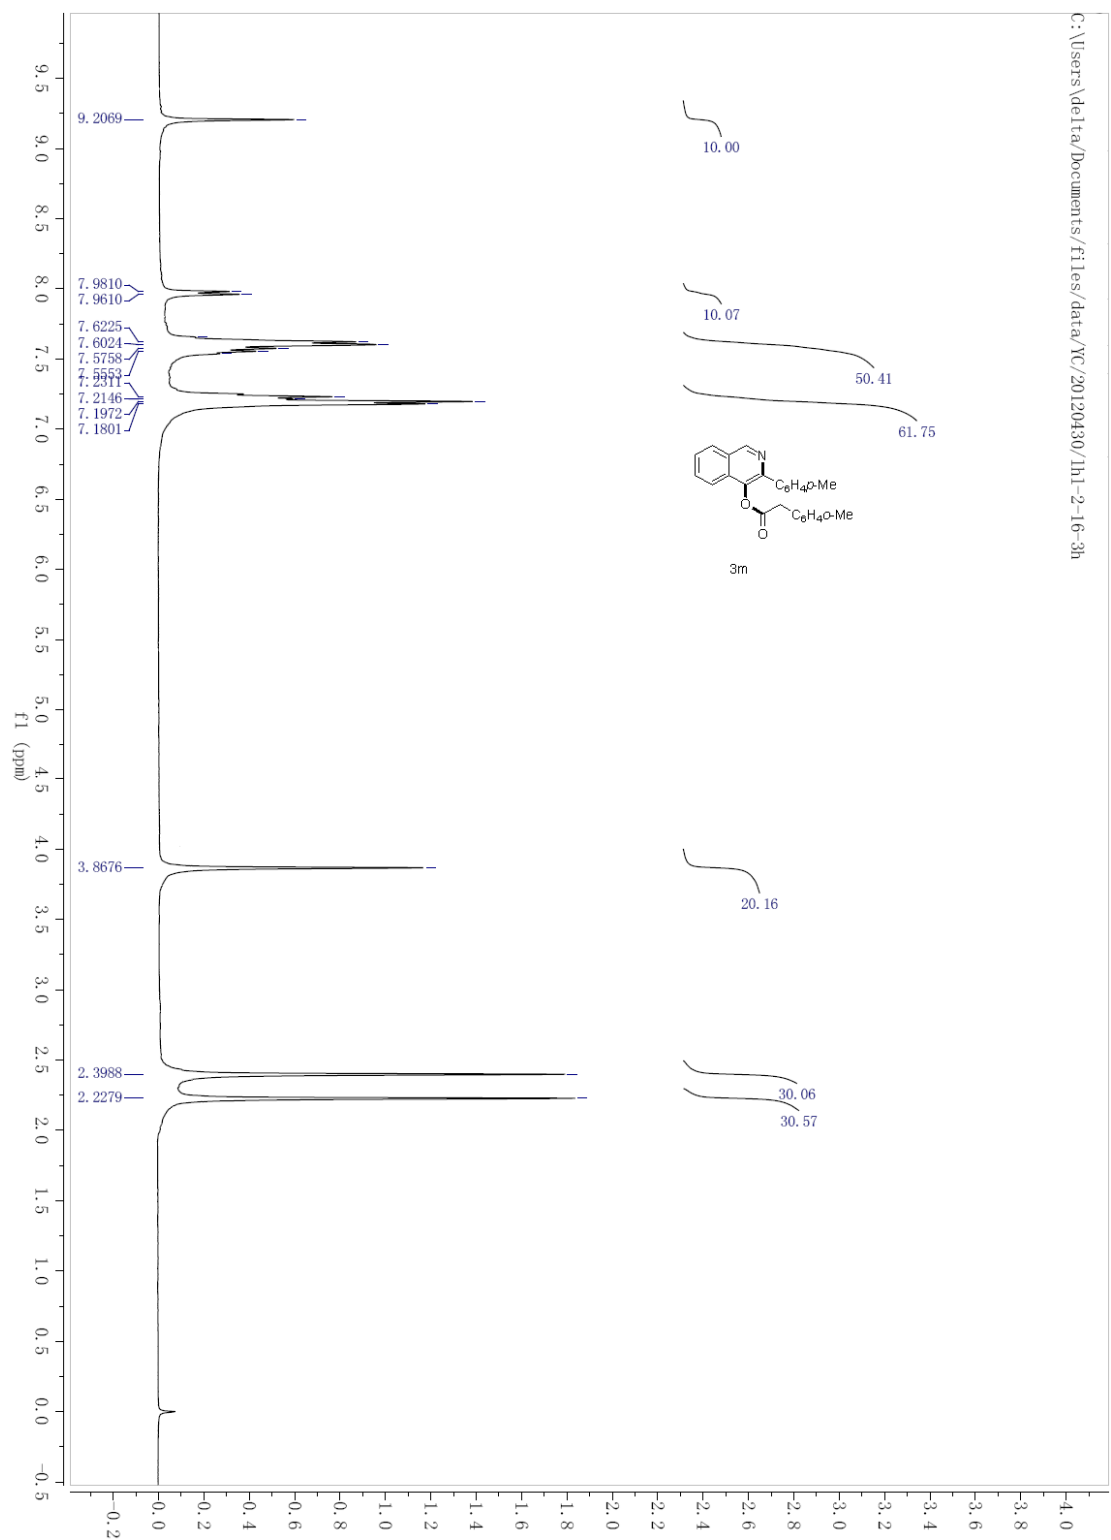

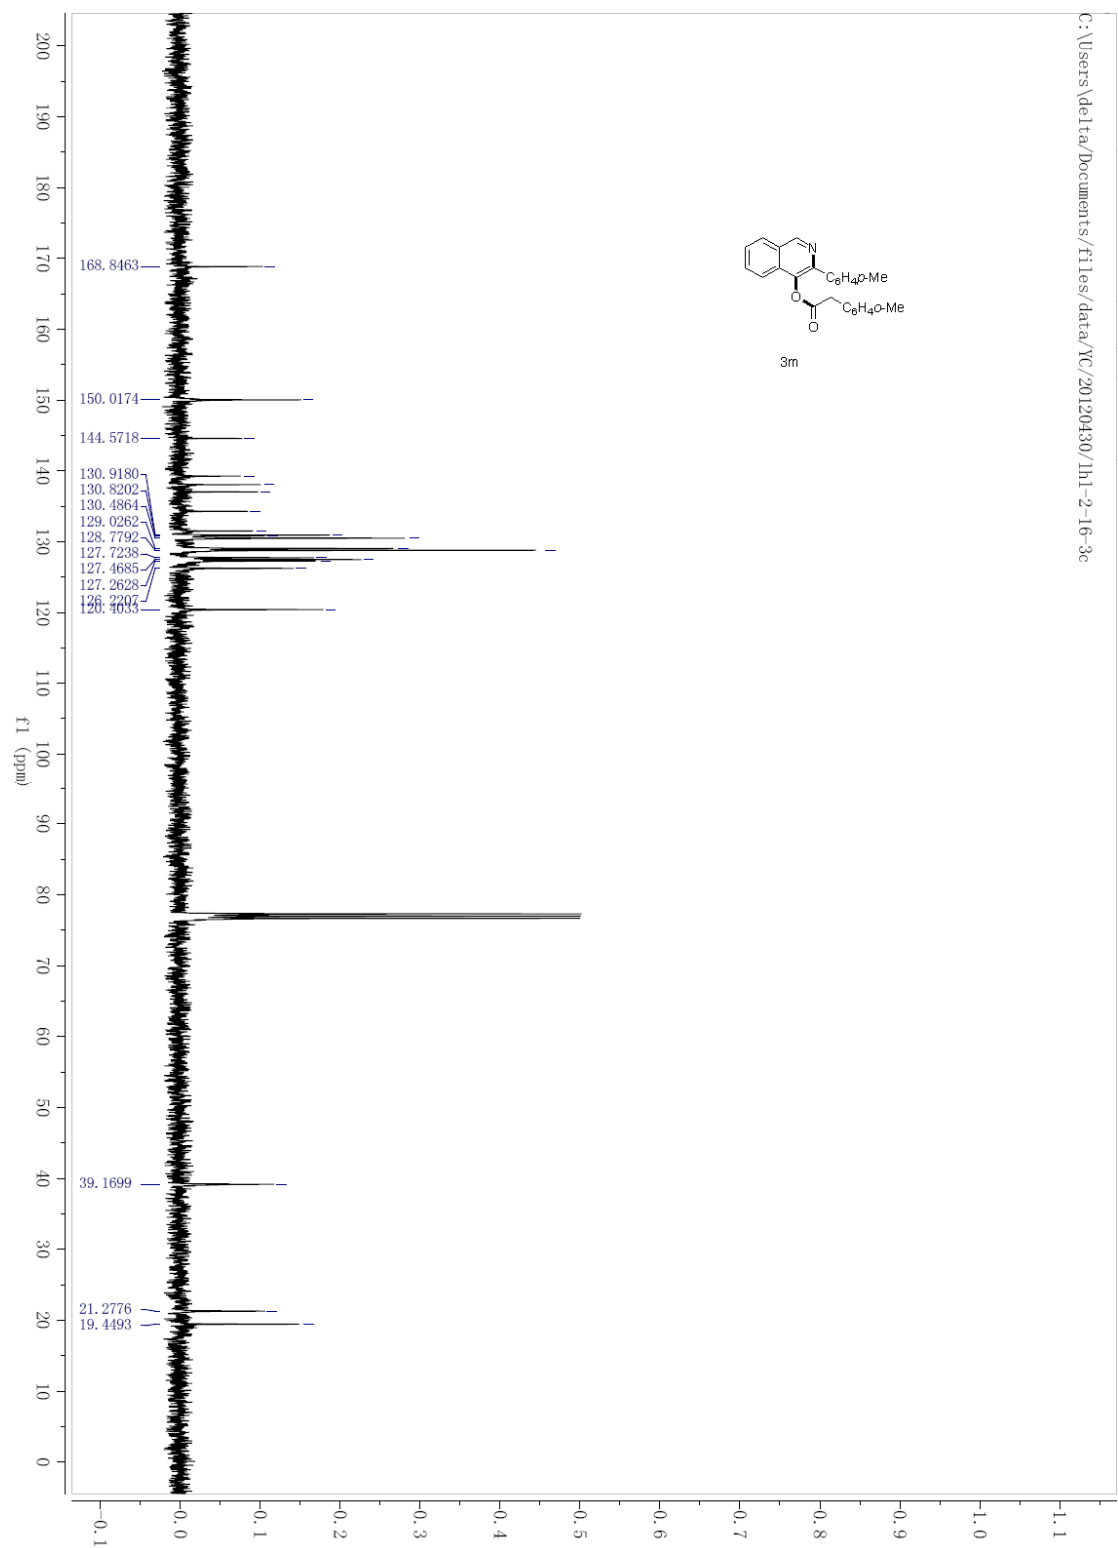

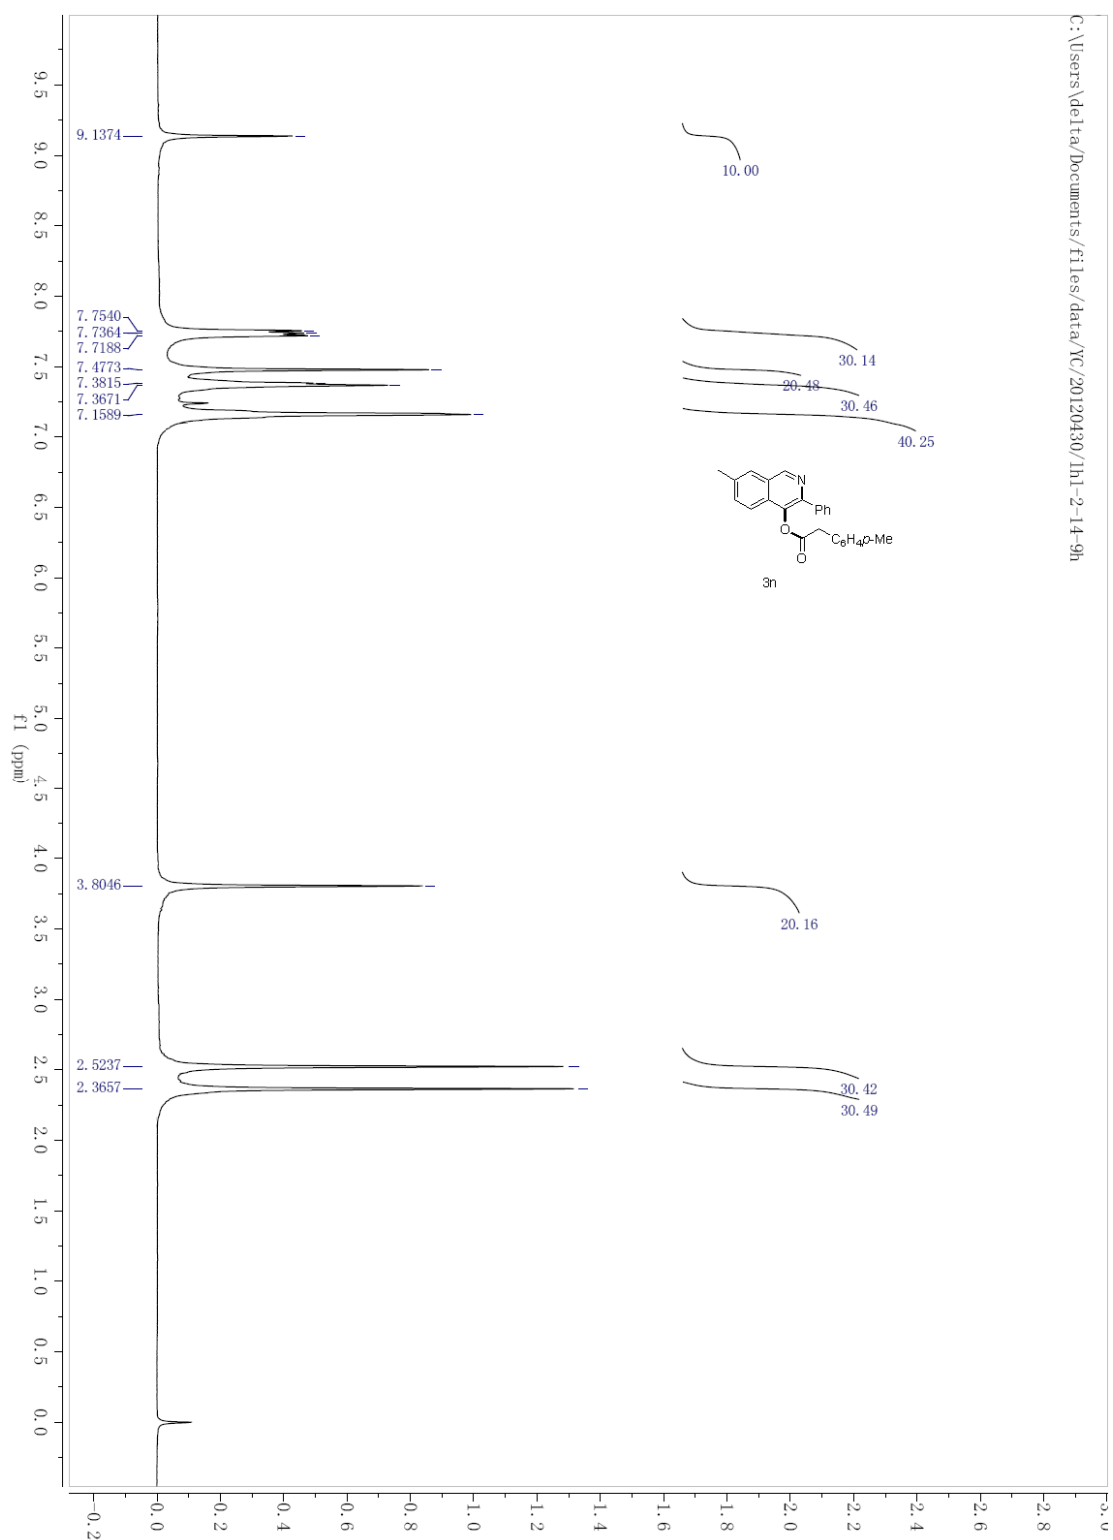

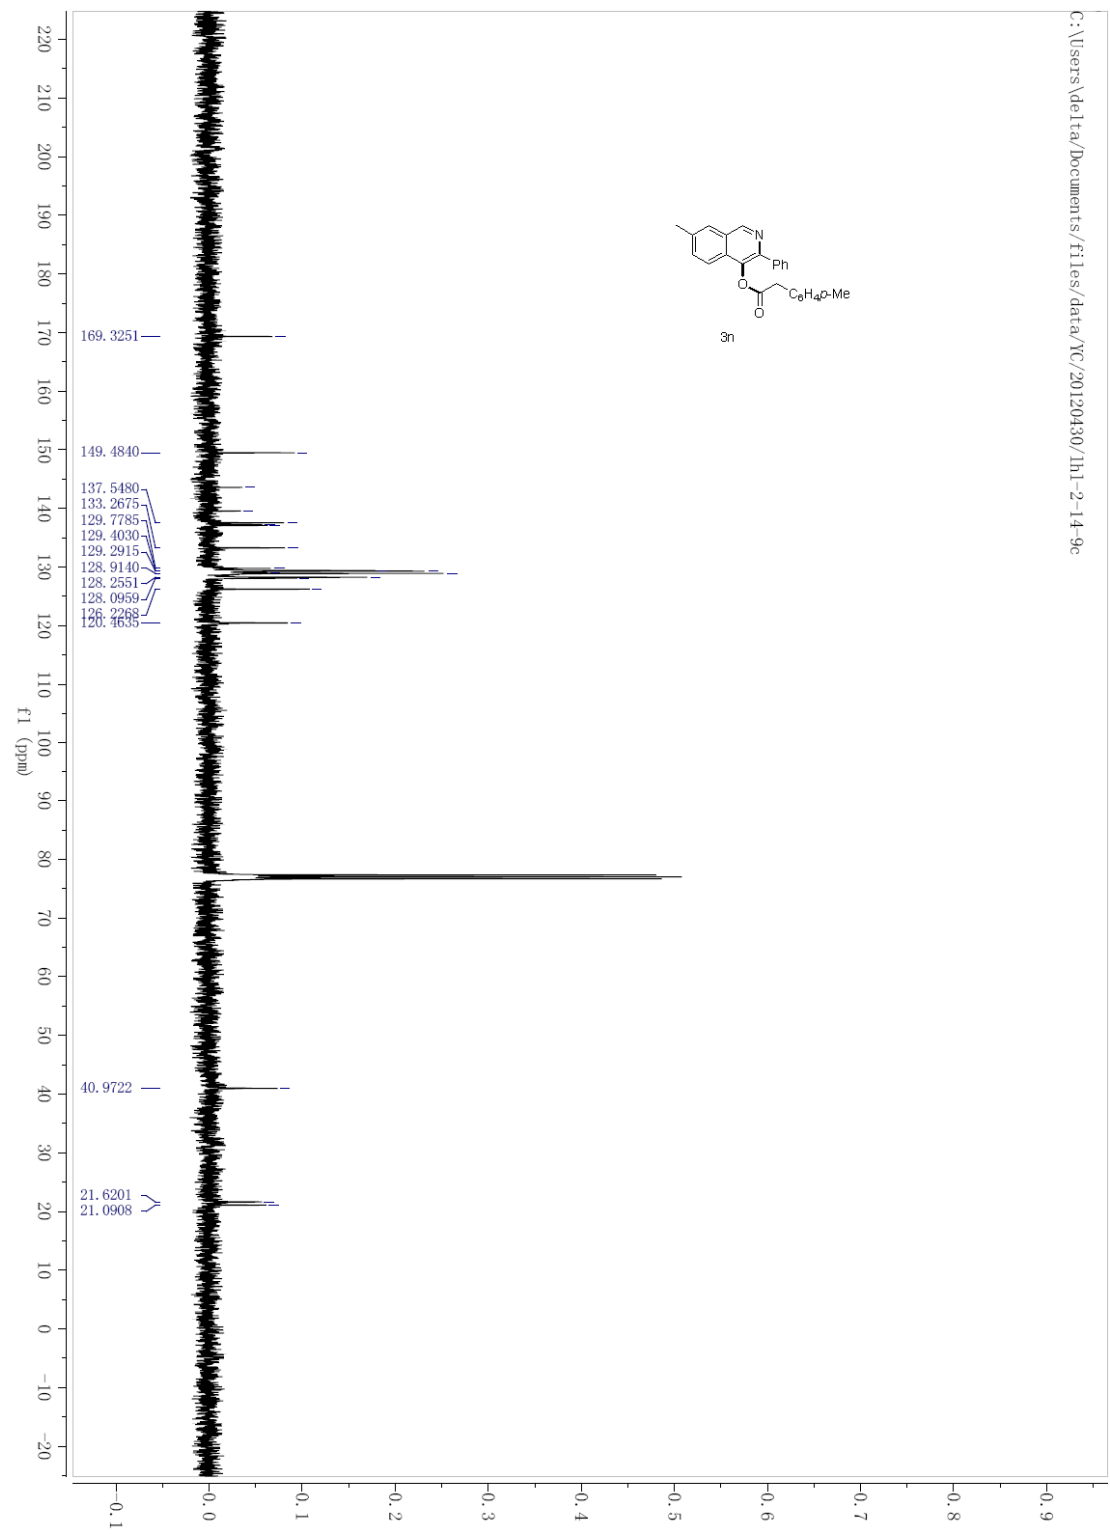

## checkCIF/PLATON report

You have not supplied any structure factors. As a result the full set of tests cannot be run.

No syntax errors found.      CIF dictionary      Interpreting this report

### Datablock: a20611b

---

|                        |                |                    |             |
|------------------------|----------------|--------------------|-------------|
| Bond precision:        | C-C = 0.0071 Å | Wavelength=0.71073 |             |
| Cell:                  | a=17.532(4)    | b=7.5384(19)       | c=13.756(3) |
|                        | alpha=90       | beta=100.059(4)    | gamma=90    |
| Temperature:           | 293 K          |                    |             |
|                        | Calculated     | Reported           |             |
| Volume                 | 1790.1(7)      | 1790.1(8)          |             |
| Space group            | P 21/c         | P2(1)/c            |             |
| Hall group             | -P 2ybc        | ?                  |             |
| Moiety formula         | C23 H16 F N O2 | ?                  |             |
| Sum formula            | C23 H16 F N O2 | C23 H16 F N O2     |             |
| Mr                     | 357.37         | 357.37             |             |
| Dx, g cm <sup>-3</sup> | 1.326          | 1.326              |             |
| Z                      | 4              | 4                  |             |
| Mu (mm <sup>-1</sup> ) | 0.092          | 0.092              |             |
| F000                   | 744.0          | 744.0              |             |
| F000'                  | 744.38         |                    |             |
| h,k,lmax               | 20,8,16        | 20,8,16            |             |
| Nref                   | 3150           | 3148               |             |
| Tmin,Tmax              | 0.989,0.993    | 0.989,0.993        |             |
| Tmin'                  | 0.989          |                    |             |

Correction method= MULTI-SCAN

Data completeness= 0.999      Theta(max)= 25.010

R(reflections)= 0.0694( 1151)      wR2(reflections)= 0.1420( 3148)

S = 0.922      Npar= 244

---

The following ALERTS were generated. Each ALERT has the format

**test-name\_ALERT\_alert-type\_alert-level.**

Click on the hyperlinks for more details of the test.

---

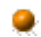

#### Alert level B

PLAT026\_ALERT\_3\_B Ratio Observed / Unique Reflections too Low ....

37 Perc.

---

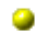

#### Alert level C

```
RINTA01_ALERT_3_C The value of Rint is greater than 0.12
                   Rint given    0.136
PLAT241_ALERT_2_C Check High      Ueq as Compared to Neighbors for      C11
PLAT242_ALERT_2_C Check Low       Ueq as Compared to Neighbors for      C12
PLAT242_ALERT_2_C Check Low       Ueq as Compared to Neighbors for      C15
PLAT334_ALERT_2_C Small Average Benzene C-C Dist. C12 -C17      1.36 Ang.
PLAT340_ALERT_3_C Low Bond Precision on C-C Bonds .....      0.0071 Ang
```

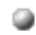

#### Alert level G

```
PLAT005_ALERT_5_G No _iucr_refine_instructions_details in CIF ....      ?
PLAT199_ALERT_1_G Check the Reported _cell_measurement_temperature      293 K
PLAT200_ALERT_1_G Check the Reported _diffrn_ambient_temperature      293 K
```

- 
- 0 **ALERT level A** = Most likely a serious problem - resolve or explain  
1 **ALERT level B** = A potentially serious problem, consider carefully  
6 **ALERT level C** = Check. Ensure it is not caused by an omission or oversight  
3 **ALERT level G** = General information/check it is not something unexpected
- 2 ALERT type 1 CIF construction/syntax error, inconsistent or missing data  
4 ALERT type 2 Indicator that the structure model may be wrong or deficient  
3 ALERT type 3 Indicator that the structure quality may be low  
0 ALERT type 4 Improvement, methodology, query or suggestion  
1 ALERT type 5 Informative message, check
- 

It is advisable to attempt to resolve as many as possible of the alerts in all categories. Often the minor alerts point to easily fixed oversights, errors and omissions in your CIF or refinement strategy, so attention to these fine details can be worthwhile. In order to resolve some of the more serious problems it may be necessary to carry out additional measurements or structure refinements. However, the purpose of your study may justify the reported deviations and the more serious of these should normally be commented upon in the discussion or experimental section of a paper or in the "special\_details" fields of the CIF. checkCIF was carefully designed to identify outliers and unusual parameters, but every test has its limitations and alerts that are not important in a particular case may appear. Conversely, the absence of alerts does not guarantee there are no aspects of the results needing attention. It is up to the individual to critically assess their own results and, if necessary, seek expert advice.

#### Publication of your CIF in IUCr journals

A basic structural check has been run on your CIF. These basic checks will be run on all CIFs submitted for publication in IUCr journals (*Acta Crystallographica*, *Journal of Applied Crystallography*, *Journal of Synchrotron Radiation*); however, if you intend to submit to *Acta Crystallographica Section C* or *E*, you should make sure that full publication checks are run on the final version of your CIF prior to submission.

#### Publication of your CIF in other journals

Please refer to the *Notes for Authors* of the relevant journal for any special instructions relating to CIF submission.

Datablock a20611b - ellipsoid plot

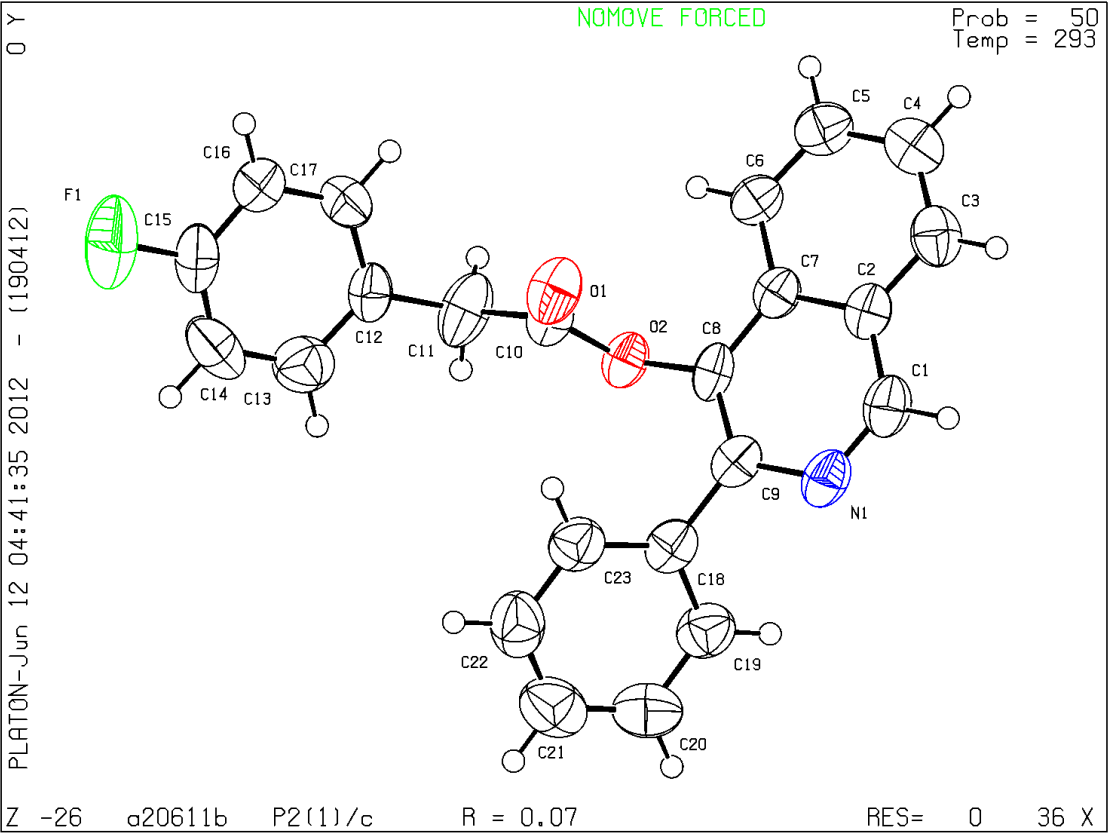

Supplement: c3ob27427f.pdf [file c3ob27427f.pdf]
